# Supplementary material for: Account of chemical bonding and enhanced reactivity of vanadium-doped rhodium clusters toward C–H activation: a DFT investigation
Source: Royal Society of Chemistry journal article supplement (doi:10.1039/c9cp00444k), 2019-01-01
Supplement: c9cp00444k1.pdf [file c9cp00444k1.pdf]

Supplementary Information for

**Account of chemical bonding and enhanced reactivity of  
vanadium-doped rhodium clusters toward C-H activation: a DFT  
investigation**

**Turbasu Sengupta, Jin Suk Chung,\* and Sung Gu Kang\***

School of Chemical Engineering, University of Ulsan, 93 Daehakro, Nam-Gu, Ulsan 44610, South Korea

\*(J.S.C.) E-mail: jschung@mail.ulsan.ac.kr.

\*(S.G.K.) E-mail: sgkang@mail.ulsan.ac.kr.

**\*To whom correspondence should be addressed**

## *Content Index*

| Title                                                                                                                                                             | Page Number |
|-------------------------------------------------------------------------------------------------------------------------------------------------------------------|-------------|
| 1. Cartesian Coordinates, Energies, and Normal Modes of Vibration for Ground State Rh <sub>n</sub> Cluster                                                        | 3-4         |
| 2. Cartesian Coordinates, Energies, and Normal Modes of Vibration for Ground State Rh <sub>m</sub> V Cluster                                                      | 5-6         |
| 3. Cartesian Coordinates, Energies, and Normal Modes of Vibration for the Pre-Reaction Complexes (A) of the reaction CH <sub>4</sub> + Rh <sub>n</sub> Cluster    | 7-8         |
| 4. Cartesian Coordinates, Energies, and Normal Modes of Vibration for the Transition States (T.S) of the reaction CH <sub>4</sub> + Rh <sub>n</sub> Cluster       | 9-10        |
| 5. Cartesian Coordinates, Energies, and Normal Modes of Vibration for the Post-Reaction Complexes (B) of the reaction CH <sub>4</sub> + Rh <sub>n</sub> Cluster   | 11-12       |
| 6. Cartesian Coordinates, Energies, and Normal Modes of Vibration for the Pre-Reaction Complexes (A) of the reaction CH <sub>4</sub> + Rh <sub>m</sub> V Cluster  | 13-14       |
| 7. Cartesian Coordinates, Energies, and Normal Modes of Vibration for the Transition States (T.S) of the reaction CH <sub>4</sub> + Rh <sub>m</sub> V Cluster     | 15-16       |
| 8. Cartesian Coordinates, Energies, and Normal Modes of Vibration for the Post-Reaction Complexes (B) of the reaction CH <sub>4</sub> + Rh <sub>m</sub> V Cluster | 17-18       |
| 9. Ionization Energies (eV) of Rh <sub>n</sub> and Rh <sub>m</sub> V Clusters                                                                                     | 19          |
| 10. Table of Binding Energies per atom (eV) of Rh <sub>n</sub> and Rh <sub>m</sub> V Clusters                                                                     | 20-24       |
| 11. Thermochemical Data                                                                                                                                           | 25-32       |
| 12. Combined Plots of Properties with B3LYP and TPSSh functional                                                                                                  | 33          |
| 13. Sample IRC Plots                                                                                                                                              | 34-36       |
| 14. Variation of Mayer Bond Order along the IRC of the Reaction Rh <sub>3</sub> V+CH <sub>4</sub>                                                                 | 37          |
| 15. Bond Order Analysis                                                                                                                                           | 37          |
| 16. Energies of Selected Isomers of Al <sub>7</sub> V Cluster at Different Spin Multiplicities                                                                    | 38          |
| 17. Energies of A, T.S., and B at Different Spin Multiplicities for Selected Pristine and V-Doped Rhodium Clusters                                                | 39          |
| 18. Table of the Spin Contamination Values for Selected Complexes                                                                                                 | 42          |

# 1. Cartesian Coordinates, Energies, and Normal Modes of Vibration for Ground State

## Rh<sub>n</sub> Cluster [B3LYP(D3BJ)]

(Spin Multiplicities (M=2S+1) are included within parenthesis, energies are in kcal/mol)

Only first six normal vibrational modes are included

### Rh<sub>2</sub>(5)

Energy: -138760.9953341

Rh 0.00000 0.00000 1.10346

Rh 0.00000 0.00000 -1.10346

Frequencies -- 336.0842

### Rh<sub>3</sub>(6)

Energy: -208180.6595270

Rh -1.23813 0.72194 0.00000

Rh 0.00000 -1.42260 0.00000

Rh 1.23813 0.70066 0.00000

Frequencies -- 118.8831 151.5793 267.6398

### Rh<sub>4</sub>(7)

Energy: -277606.2186387

Rh -1.30281 0.01329 0.88079

Rh 0.01543 1.28566 -0.87909

Rh -0.01471 -1.28253 -0.88340

Rh 1.30210 -0.01642 0.88170

Frequencies -- 78.0693 114.4283 132.8905

Frequencies -- 153.9466 170.0035 273.7842

### Rh<sub>5</sub>(8)

Energy: -347021.1711523

Rh 0.00000 0.00000 1.53217

Rh 0.00000 1.32699 -0.76575

Rh -0.00000 -1.32699 -0.76575

Rh -2.00313 0.00000 -0.00034

Rh 2.00313 -0.00000 -0.00034

Frequencies -- 123.8375 124.0834 157.1070

Frequencies -- 183.9455 184.1865 194.4992

### Rh<sub>6</sub>(7)

Energy: -416462.7903353

Rh 0.00000 0.00000 1.81198

Rh -0.00000 1.81198 -0.00000

Rh 0.00000 -1.81198 0.00000

Rh -1.81198 -0.00000 -0.00000

Rh 1.81198 -0.00000 0.00000

Rh 0.00000 -0.00000 -1.81198

Frequencies -- 134.5269 134.5281 134.5293

Frequencies -- 141.1082 141.1082 180.4482

### Rh<sub>7</sub>(14)

Energy: -485892.0152305

Rh 1.89538 1.03787 0.00004

Rh 1.53470 -1.52022 -0.00076

Rh -0.91309 -1.92121 0.00099

Rh -2.16396 0.30408 -0.00067

Rh -0.34800 2.09849 0.00031

Rh -0.00231 0.00059 1.54237

Rh -0.00273 0.00041 -1.54228

Frequencies -- 45.9492 51.9125 59.3460

Frequencies -- 84.7627 101.4309 119.3011

**Rh<sub>8</sub>(13)**

**Energy: -555307.2017851**

|                |          |          |          |
|----------------|----------|----------|----------|
| Rh             | 0.00964  | 1.17236  | 1.72892  |
| Rh             | 0.00268  | 1.23803  | -0.75860 |
| Rh             | -0.01246 | -1.16752 | 1.73218  |
| Rh             | -1.95795 | 0.01415  | 0.72758  |
| Rh             | 1.95676  | -0.01211 | 0.73081  |
| Rh             | -0.00145 | -1.24015 | -0.75514 |
| Rh             | -1.96086 | 0.00552  | -1.70449 |
| Rh             | 1.96364  | -0.01028 | -1.70126 |
| Frequencies -- | 36.3313  | 52.5114  | 82.2821  |
| Frequencies -- | 87.0303  | 106.5357 | 110.0020 |

**Rh<sub>9</sub>(18)**

**Energy: -624762.5756318**

|                |          |          |          |
|----------------|----------|----------|----------|
| Rh             | 0.74012  | -1.30680 | -1.32440 |
| Rh             | -1.50047 | 0.00156  | -1.70715 |
| Rh             | -1.43821 | -1.81574 | 0.02918  |
| Rh             | 0.82870  | 1.30577  | 1.29266  |
| Rh             | -1.43900 | 1.81520  | 0.03220  |
| Rh             | -1.37158 | -0.00163 | 1.78710  |
| Rh             | 0.82885  | -1.30793 | 1.29048  |
| Rh             | 0.74022  | 1.30926  | -1.32186 |
| Rh             | 2.61138  | 0.00031  | -0.07821 |
| Frequencies -- | 39.5063  | 76.2880  | 89.6303  |
| Frequencies -- | 98.1552  | 100.4714 | 106.0913 |

## 2. Cartesian Coordinates, Energies, and Normal Modes of Vibration for Ground State

### Rh<sub>m</sub>V Cluster

(Spin Multiplicities (M=2S+1) are included within parenthesis, energies are in kcal/mol)

Only first six normal vibrational modes are included

#### RhV(3)

Energy: -661748.7756679

Rh 0.00000 0.00000 0.65761

V 0.00000 0.00000 -1.28663

Frequencies -- 441.7509

#### Rh<sub>2</sub>V(4)

Energy: -731152.8475488

Rh 0.00000 1.26777 -0.36302

Rh -0.00000 -1.26777 -0.36302

V 0.00000 0.00000 1.42051

Frequencies -- 88.0103 173.4859 370.9549

#### Rh<sub>3</sub>V(1)

Energy: -800591.7238974

Rh -0.58771 -0.64052 1.47706

Rh -0.58771 -0.64052 -1.47706

Rh 1.47581 0.87110 0.00000

V -0.58771 0.80206 0.00000

Frequencies -- 80.7003 80.7424 141.6775

Frequencies -- 339.2791 339.3234 425.2359

#### Rh<sub>4</sub>V(2)

Energy: -870012.8370969

Rh 2.00190 -0.00000 0.43679

Rh 0.00000 1.31799 -0.75885

Rh -2.00190 -0.00000 0.43679

Rh -0.00000 -1.31799 -0.75885

V 0.00000 0.00001 1.26024

Frequencies -- 89.7390 96.2243 133.3895

Frequencies -- 158.3877 159.0405 187.0309

#### Rh<sub>5</sub>V(5)

Energy: -939439.6333108

Rh 0.06974 1.69555 -0.57213

Rh 0.84874 -1.67091 -0.53441

Rh 2.12245 0.33980 0.16128

Rh -0.10071 -0.05907 1.40609

Rh -2.54292 -0.18996 0.03705

V -0.77733 -0.22578 -0.97411

Frequencies -- 28.9528 60.0057 96.6591

Frequencies -- 114.7205 125.2924 138.2843

#### Rh<sub>6</sub>V(8)

Energy: -1008877.5575079

Rh 2.59264 -0.00117 -0.47316

Rh 0.66686 1.32546 0.82542

Rh -1.35938 -1.30065 -0.91441

Rh 0.66525 -1.32526 0.82596

Rh -1.35729 1.30068 -0.91576

Rh -1.51918 0.00116 1.29521

V 0.60866 -0.00045 -1.25852

Frequencies -- 67.0991 84.1874 117.4979

Frequencies -- 120.0222            127.1976            137.0229

**Rh<sub>7</sub>V(9)**

**Energy: -1078310.6361521**

|                |          |          |          |
|----------------|----------|----------|----------|
| Rh             | 0.59038  | -1.89745 | 0.00456  |
| Rh             | 1.69801  | 0.00089  | 1.52186  |
| Rh             | -2.09977 | -1.37787 | 0.21300  |
| Rh             | 2.08056  | -0.00017 | -1.02513 |
| Rh             | -0.49052 | -0.00070 | -1.44087 |
| Rh             | 0.58973  | 1.89745  | 0.00305  |
| Rh             | -2.10030 | 1.37759  | 0.21309  |
| V              | -0.52453 | 0.00050  | 0.99869  |
| Frequencies -- | 16.9835  | 76.6880  | 104.9019 |
| Frequencies -- | 108.7667 | 114.6872 | 118.7792 |

**Rh<sub>8</sub>V(12)**

**Energy: -1147750.0134477**

|                |          |          |          |
|----------------|----------|----------|----------|
| Rh             | 0.07691  | -1.64583 | -1.38427 |
| Rh             | 1.31817  | 0.83031  | 1.51637  |
| Rh             | -2.15270 | -1.02628 | -0.22262 |
| Rh             | -1.90194 | 1.49969  | -1.06571 |
| Rh             | 0.03414  | -1.44057 | 1.24868  |
| Rh             | -1.34865 | 0.80060  | 1.50482  |
| Rh             | 1.80653  | 1.58287  | -1.02280 |
| Rh             | 2.19197  | -0.93053 | -0.26406 |
| V              | -0.04779 | 0.64515  | -0.60734 |
| Frequencies -- | 34.6614  | 61.5811  | 69.3212  |
| Frequencies -- | 94.8547  | 103.3156 | 107.3935 |

### 3. Cartesian Coordinates, Energies, and Normal Modes of Vibration for the Pre-Reaction Complexes (A) of the reaction $\text{CH}_4 + \text{Rh}_n$ Cluster [B3LYP(D3BJ)]

(Spin Multiplicities ( $M=2S+1$ ) are included within parenthesis, energies are in kcal/mol)

Only first six normal vibrational modes are included

**Rh<sub>3</sub>-CH<sub>4</sub>**  
**Energy: -233624.0103343**

|                |          |          |          |
|----------------|----------|----------|----------|
| Rh             | -1.34499 | -0.93853 | -0.00270 |
| Rh             | 1.08086  | -0.46277 | 0.00519  |
| Rh             | -0.57648 | 1.39068  | -0.00003 |
| C              | 3.78181  | 0.04381  | -0.01091 |
| H              | 4.35543  | 0.96859  | -0.03474 |
| H              | 3.17047  | 0.05429  | 0.90217  |
| H              | 3.16594  | 0.01050  | -0.92054 |
| H              | 4.44483  | -0.81828 | 0.00812  |
| Frequencies -- | 15.8782  | 38.1425  | 57.5491  |
| Frequencies -- | 113.2754 | 138.6825 | 151.7570 |

**Rh<sub>4</sub>-CH<sub>4</sub>**  
**Energy: -303050.1123822**

|                |          |          |          |
|----------------|----------|----------|----------|
| Rh             | -0.57548 | -1.26659 | -0.83728 |
| Rh             | 1.26217  | -0.17519 | 0.51270  |
| Rh             | -1.27019 | 0.12416  | 1.14494  |
| Rh             | -0.26818 | 1.31682  | -0.84582 |
| C              | 3.83105  | 0.00327  | 0.12036  |
| H              | 3.33734  | 0.83881  | 0.63406  |
| H              | 3.11469  | -0.71630 | -0.32447 |
| H              | 4.40970  | 0.41769  | -0.70317 |
| H              | 4.47814  | -0.52415 | 0.81759  |
| Frequencies -- | 28.6687  | 45.2434  | 73.9444  |
| Frequencies -- | 75.1911  | 91.5432  | 138.9218 |

**Rh<sub>5</sub>-CH<sub>4</sub>**  
**Energy: -372473.6440942**

|                |          |          |          |
|----------------|----------|----------|----------|
| Rh             | 0.18138  | -1.18844 | -0.95053 |
| Rh             | 0.13974  | -0.23063 | 1.53085  |
| Rh             | 0.23180  | 1.47463  | -0.50111 |
| Rh             | -1.81901 | 0.22480  | -0.10095 |
| Rh             | 2.19823  | -0.13453 | -0.00281 |
| C              | -4.19337 | -0.65125 | 0.10906  |
| H              | -4.57914 | -1.62264 | 0.41135  |
| H              | -3.56682 | -0.81672 | -0.78717 |
| H              | -5.00527 | 0.02612  | -0.14407 |
| H              | -3.63477 | -0.24183 | 0.97039  |
| Frequencies -- | 16.9048  | 36.4996  | 57.6881  |
| Frequencies -- | 90.8087  | 102.2754 | 124.0464 |

**Rh<sub>6</sub>-CH<sub>4</sub>**  
**Energy: -441907.1742842**

|    |          |          |          |
|----|----------|----------|----------|
| Rh | -1.58038 | -0.60339 | 0.04610  |
| Rh | -0.15390 | 1.00720  | 1.47112  |
| Rh | 0.45543  | -1.00384 | -1.46518 |
| Rh | -0.34181 | 1.39276  | -1.05110 |
| Rh | 0.64583  | -1.38065 | 1.04130  |
| Rh | 1.87717  | 0.57474  | -0.03981 |
| C  | -4.05946 | 0.05448  | -0.00932 |
| H  | -3.53813 | -0.05726 | 0.95415  |
| H  | -4.52032 | 1.04009  | -0.01953 |
| H  | -3.37911 | 0.00924  | -0.88254 |

|                |          |          |          |
|----------------|----------|----------|----------|
| H              | -4.81072 | -0.72577 | -0.10517 |
| Frequencies -- | 12.8344  | 51.1861  | 110.7785 |
| Frequencies -- | 128.6672 | 131.5664 | 135.1797 |

**Rh<sub>7</sub>-CH<sub>4</sub>**

**Energy: -511335.4907822**

|                |          |          |          |
|----------------|----------|----------|----------|
| Rh             | 0.92371  | 1.88636  | 0.25024  |
| Rh             | -1.43776 | 1.51541  | -0.46515 |
| Rh             | -1.75349 | -1.01696 | -0.65856 |
| Rh             | 0.44040  | -2.04801 | -0.03166 |
| Rh             | 2.20725  | -0.29117 | 0.35964  |
| Rh             | 0.45232  | 0.06921  | -1.60299 |
| Rh             | -0.32833 | -0.04821 | 1.42402  |
| C              | -2.26360 | -0.30049 | 3.26218  |
| H              | -2.07145 | 0.57641  | 2.62065  |
| H              | -3.32646 | -0.52028 | 3.18011  |
| H              | -1.71247 | -1.19211 | 2.93878  |
| H              | -1.99274 | -0.05945 | 4.28720  |
| Frequencies -- | 27.9190  | 49.5539  | 53.2291  |
| Frequencies -- | 81.0456  | 84.1090  | 93.7129  |

**Rh<sub>8</sub>-CH<sub>4</sub>**

**Energy: -580770.4058323**

|                |          |          |          |
|----------------|----------|----------|----------|
| Rh             | 2.03859  | 0.13686  | -1.20318 |
| Rh             | -0.50159 | 0.57450  | -1.55260 |
| Rh             | 1.93893  | -0.81185 | 1.18445  |
| Rh             | 0.71115  | 1.41257  | 0.65166  |
| Rh             | 0.33483  | -1.73886 | -0.62719 |
| Rh             | -0.61988 | -0.66577 | 1.56183  |
| Rh             | -1.92434 | 1.28831  | 0.47856  |
| Rh             | -2.18761 | -1.08946 | -0.47238 |
| C              | 0.94696  | 4.02176  | -0.09231 |
| H              | 0.66847  | 4.50832  | -1.02512 |
| H              | 0.03797  | 3.55955  | 0.32379  |
| H              | 1.72011  | 3.27575  | -0.31802 |
| H              | 1.33857  | 4.74256  | 0.62149  |
| Frequencies -- | 30.8921  | 47.2636  | 52.4767  |
| Frequencies -- | 91.2875  | 99.1751  | 104.0716 |

**Rh<sub>9</sub>-CH<sub>4</sub>**

**Energy: -650207.4464389**

|                |          |          |          |
|----------------|----------|----------|----------|
| Rh             | 0.80381  | 1.18693  | -1.29839 |
| Rh             | 0.42413  | -1.39954 | -1.49754 |
| Rh             | 2.29905  | -0.55444 | 0.00159  |
| Rh             | -1.63238 | 0.22787  | 1.29913  |
| Rh             | -1.51384 | -2.05720 | -0.00115 |
| Rh             | 0.42206  | -1.39991 | 1.49800  |
| Rh             | 0.80206  | 1.18659  | 1.30000  |
| Rh             | -1.63057 | 0.22822  | -1.30093 |
| Rh             | -1.08817 | 2.41872  | -0.00023 |
| C              | 5.01315  | 0.73128  | -0.00211 |
| H              | 4.45322  | 0.46282  | -0.90253 |
| H              | 5.18452  | 1.80624  | -0.00827 |
| H              | 4.44693  | 0.47435  | 0.89781  |
| H              | 5.95943  | 0.19310  | 0.00464  |
| Frequencies -- | 9.9364   | 22.4101  | 45.6283  |
| Frequencies -- | 78.3156  | 83.7597  | 84.0888  |



#### 4. Cartesian Coordinates, Energies, and Normal Modes of Vibration for the Transition States (T.S) of the reaction $\text{CH}_4 + \text{Rh}_n$ Cluster [B3LYP(D3BJ)]

(Spin Multiplicities ( $M=2S+1$ ) are included within parenthesis, energies are in kcal/mol)

Only first six normal vibrational modes are included

| <b>Rh<sub>3</sub>-CH<sub>4</sub></b> |                  |          |          |
|--------------------------------------|------------------|----------|----------|
| <b>Energy: -233607.5750995</b>       |                  |          |          |
| Rh                                   | -1.30548         | -1.01638 | 0.00490  |
| Rh                                   | 1.31062          | -0.27824 | -0.02134 |
| Rh                                   | -0.75631         | 1.28603  | 0.00853  |
| C                                    | 3.39605          | -0.02664 | 0.08645  |
| H                                    | 2.19017          | 0.82258  | -0.68468 |
| H                                    | 3.62226          | 0.49608  | 1.01678  |
| H                                    | 3.56062          | -1.10784 | 0.20653  |
| H                                    | 4.05312          | 0.33533  | -0.70161 |
| Frequencies --                       | <b>-736.3081</b> | 54.8111  | 79.1659  |
| Frequencies --                       | 87.6238          | 128.4428 | 137.4248 |

| <b>Rh<sub>4</sub>-CH<sub>4</sub></b> |                  |          |          |
|--------------------------------------|------------------|----------|----------|
| <b>Energy: -303035.4233763</b>       |                  |          |          |
| Rh                                   | 0.81349          | 1.28771  | -0.64077 |
| Rh                                   | -1.39697         | -0.00028 | -0.28147 |
| Rh                                   | 0.53299          | 0.00093  | 1.50934  |
| Rh                                   | 0.81376          | -1.28837 | -0.63929 |
| C                                    | -3.45934         | -0.00007 | 0.15585  |
| H                                    | -2.13193         | 0.00076  | 1.10144  |
| H                                    | -3.73495         | 0.90299  | -0.39890 |
| H                                    | -3.73543         | -0.90475 | -0.39598 |
| H                                    | -3.98842         | 0.00166  | 1.10672  |
| Frequencies --                       | <b>-821.8279</b> | 67.0602  | 74.0226  |
| Frequencies --                       | 99.1172          | 110.2123 | 116.0154 |

| <b>Rh<sub>5</sub>-CH<sub>4</sub></b> |                  |          |          |
|--------------------------------------|------------------|----------|----------|
| <b>Energy: -372461.4740582</b>       |                  |          |          |
| Rh                                   | -0.06578         | -0.00415 | 1.52716  |
| Rh                                   | -0.22924         | -1.44625 | -0.66562 |
| Rh                                   | -0.23103         | 1.44796  | -0.66023 |
| Rh                                   | 1.83190          | 0.00159  | -0.26438 |
| Rh                                   | -2.16106         | 0.00058  | -0.00973 |
| C                                    | 3.87227          | 0.00117  | 0.25216  |
| H                                    | 4.37108          | 0.00605  | 1.21988  |
| H                                    | 2.55232          | 0.00276  | 1.12555  |
| H                                    | 4.16412          | 0.90273  | -0.29595 |
| H                                    | 4.16319          | -0.90622 | -0.28647 |
| Frequencies --                       | <b>-862.3613</b> | 32.2961  | 64.1113  |
| Frequencies --                       | 71.1023          | 88.0166  | 113.1522 |

| <b>Rh<sub>6</sub>-CH<sub>4</sub></b> |          |          |          |
|--------------------------------------|----------|----------|----------|
| <b>Energy: -441892.9410316</b>       |          |          |          |
| Rh                                   | 1.65093  | -0.53786 | -0.00031 |
| Rh                                   | -0.13473 | -0.00371 | -1.79471 |
| Rh                                   | -0.13321 | -0.00093 | 1.79475  |
| Rh                                   | 0.39818  | 1.77576  | -0.00158 |
| Rh                                   | -0.72646 | -1.71610 | 0.00146  |
| Rh                                   | -1.87897 | 0.50736  | 0.00035  |
| C                                    | 3.72676  | -0.19059 | 0.00020  |
| H                                    | 3.97948  | -0.75521 | -0.90289 |
| H                                    | 4.30054  | 0.73468  | -0.00049 |
| H                                    | 2.47395  | 0.81286  | -0.00189 |

|                |                  |          |          |
|----------------|------------------|----------|----------|
| H              | 3.97696          | -0.75247 | 0.90566  |
| Frequencies -- | <b>-873.5985</b> | 62.1945  | 73.2892  |
| Frequencies -- | 119.4411         | 119.5278 | 124.0318 |

**Rh<sub>7</sub>-CH<sub>4</sub>**

**Energy: -511319.5383407**

|                |                  |          |          |
|----------------|------------------|----------|----------|
| Rh             | 1.70194          | -1.28443 | -0.38219 |
| Rh             | 1.70184          | 1.28455  | -0.38211 |
| Rh             | -0.69256         | 1.94032  | 0.06274  |
| Rh             | -2.27161         | -0.00006 | 0.02119  |
| Rh             | -0.69247         | -1.94034 | 0.06265  |
| Rh             | -0.20477         | 0.00003  | -1.64835 |
| Rh             | 0.23578          | -0.00004 | 1.49584  |
| C              | 0.91983          | -0.00015 | 3.50202  |
| H              | 1.69650          | -0.00034 | 2.07402  |
| H              | 1.94188          | -0.00090 | 3.87421  |
| H              | 0.41344          | 0.90161  | 3.85011  |
| H              | 0.41208          | -0.90109 | 3.85026  |
| Frequencies -- | <b>-844.1256</b> | 62.8690  | 66.7456  |
| Frequencies -- | 80.8443          | 89.1905  | 93.4867  |

**Rh<sub>8</sub>-CH<sub>4</sub>**

**Energy: -580755.5373380**

|                |                  |          |          |
|----------------|------------------|----------|----------|
| Rh             | 2.03496          | -0.15892 | -1.23668 |
| Rh             | -0.47767         | 0.44452  | -1.62295 |
| Rh             | 1.83966          | -0.81859 | 1.24755  |
| Rh             | 0.80856          | 1.47647  | 0.47259  |
| Rh             | 0.15093          | -1.80335 | -0.42847 |
| Rh             | -0.70900         | -0.44636 | 1.62925  |
| Rh             | -1.78958         | 1.52264  | 0.30337  |
| Rh             | -2.30264         | -0.92170 | -0.36127 |
| C              | 1.97104          | 3.21199  | 0.04955  |
| H              | 2.61834          | 3.45127  | -0.79267 |
| H              | 1.14746          | 3.92787  | 0.07017  |
| H              | 1.86145          | 1.83695  | -0.69459 |
| H              | 2.56215          | 3.24932  | 0.96703  |
| Frequencies -- | <b>-930.0583</b> | 55.0158  | 78.8680  |
| Frequencies -- | 87.4719          | 94.6621  | 100.1935 |

**Rh<sub>9</sub>-CH<sub>4</sub>**

**Energy: -650182.8938759**

|                |                  |          |          |
|----------------|------------------|----------|----------|
| Rh             | 0.84362          | 1.21170  | -1.22701 |
| Rh             | 0.58707          | -1.37022 | -1.27973 |
| Rh             | 2.56135          | -0.25419 | 0.12209  |
| Rh             | -1.74971         | 0.14888  | 1.23825  |
| Rh             | -1.66429         | -2.03890 | -0.10002 |
| Rh             | 0.41824          | -1.42807 | 1.32056  |
| Rh             | 0.68434          | 1.14215  | 1.37403  |
| Rh             | -1.55704         | 0.19754  | -1.39430 |
| Rh             | -1.13949         | 2.36108  | -0.00708 |
| C              | 4.61139          | 0.06290  | -0.16016 |
| H              | 4.90360          | 0.15660  | 0.89122  |
| H              | 4.86058          | -0.92663 | -0.55869 |
| H              | 3.16413          | 0.92050  | -0.73204 |
| H              | 5.11950          | 0.82396  | -0.74425 |
| Frequencies -- | <b>-631.1354</b> | 47.8031  | 55.0720  |
| Frequencies -- | 73.2841          | 78.7707  | 82.2643  |

## 5. Cartesian Coordinates, Energies, and Normal Modes of Vibration for the Post-Reaction Complexes (B) of the reaction $\text{CH}_4 + \text{Rh}_n$ Cluster [B3LYP(D3BJ)]

(Spin Multiplicities ( $M=2S+1$ ) are included within parenthesis, energies are in kcal/mol)

Only first six normal vibrational modes are included

**Rh<sub>3</sub>-CH<sub>4</sub>**  
**Energy: -233614.1929173**

|                |          |          |          |
|----------------|----------|----------|----------|
| Rh             | -0.70165 | 1.30200  | 0.08193  |
| Rh             | 1.33338  | -0.10928 | -0.40353 |
| Rh             | -1.16063 | -1.08765 | 0.05999  |
| C              | 2.49528  | -0.34443 | 1.23739  |
| H              | 0.68009  | -1.56068 | -0.18235 |
| H              | 3.00201  | 0.61974  | 1.36945  |
| H              | 1.91898  | -0.59030 | 2.12708  |
| H              | 3.22767  | -1.13066 | 1.03418  |
| Frequencies -- | 52.7208  | 74.1617  | 111.3929 |
| Frequencies -- | 119.0163 | 143.9199 | 193.2081 |

**Rh<sub>4</sub>-CH<sub>4</sub>**  
**Energy: -303043.2302486**

|                |          |          |          |
|----------------|----------|----------|----------|
| Rh             | 0.76110  | 1.30171  | -0.68089 |
| Rh             | -1.44013 | 0.00001  | -0.18695 |
| Rh             | 0.65683  | -0.00004 | 1.47113  |
| Rh             | 0.76110  | -1.30168 | -0.68096 |
| C              | -3.44324 | -0.00002 | 0.21773  |
| H              | -1.19075 | -0.00005 | 1.40184  |
| H              | -3.93158 | 0.00027  | -0.76650 |
| H              | -3.73410 | -0.89173 | 0.77659  |
| H              | -3.73411 | 0.89136  | 0.77712  |
| Frequencies -- | 73.5575  | 78.6335  | 90.4633  |
| Frequencies -- | 101.6753 | 120.7915 | 164.3619 |

**Rh<sub>5</sub>-CH<sub>4</sub>**  
**Energy: -372470.1203474**

|                |          |          |          |
|----------------|----------|----------|----------|
| Rh             | 0.15718  | -0.19890 | 1.55623  |
| Rh             | 0.23331  | 1.51495  | -0.51670 |
| Rh             | 0.15993  | -1.42626 | -0.77744 |
| Rh             | -1.83322 | 0.06456  | -0.18704 |
| Rh             | 2.11501  | 0.03406  | -0.11687 |
| C              | -3.84988 | 0.06216  | 0.04856  |
| H              | -4.17516 | 0.89474  | 0.67484  |
| H              | -1.73739 | -0.03496 | 1.39212  |
| H              | -4.18122 | -0.88002 | 0.48942  |
| H              | -4.25616 | 0.16895  | -0.96582 |
| Frequencies -- | 50.7507  | 66.9718  | 71.5943  |
| Frequencies -- | 79.7736  | 87.7874  | 118.3645 |

**Rh<sub>6</sub>-CH<sub>4</sub>**  
**Energy: -441899.0402517**

|    |          |          |          |
|----|----------|----------|----------|
| Rh | -1.70880 | -0.42936 | 0.06126  |
| Rh | 0.19729  | 0.00560  | 1.78435  |
| Rh | 0.04458  | -0.01616 | -1.76905 |
| Rh | -0.28482 | 1.84345  | -0.00672 |
| Rh | 0.65896  | -1.76030 | -0.01039 |
| Rh | 1.90539  | 0.39605  | -0.07120 |
| C  | -3.73249 | -0.30678 | 0.01545  |
| H  | -4.06034 | -0.83256 | 0.92060  |
| H  | -4.21037 | 0.66841  | -0.03769 |
| H  | -1.91550 | 1.13284  | 0.42925  |

|                |          |          |          |
|----------------|----------|----------|----------|
| H              | -3.98567 | -0.89524 | -0.87632 |
| Frequencies -- | 34.3291  | 74.7497  | 97.3876  |
| Frequencies -- | 99.5795  | 117.0823 | 122.4837 |

**Rh<sub>7</sub>-CH<sub>4</sub>**

**Energy: -511329.1951222**

|                |          |          |          |
|----------------|----------|----------|----------|
| Rh             | -0.58962 | -2.10971 | -0.04168 |
| Rh             | 1.86670  | -1.14824 | -0.03619 |
| Rh             | 1.64499  | 1.37759  | -0.12583 |
| Rh             | -0.78190 | 1.98682  | -0.22166 |
| Rh             | -2.13961 | -0.10785 | -0.12837 |
| Rh             | 0.04199  | -0.10011 | -1.61950 |
| Rh             | -0.02680 | 0.06660  | 1.43330  |
| C              | -0.14964 | 0.35021  | 3.45885  |
| H              | 0.69277  | -1.73273 | 1.16426  |
| H              | -0.05583 | -0.61892 | 3.95061  |
| H              | 0.66729  | 1.01365  | 3.74835  |
| H              | -1.11503 | 0.80760  | 3.68049  |
| Frequencies -- | 38.3784  | 82.4939  | 83.3007  |
| Frequencies -- | 90.3130  | 96.2374  | 100.2323 |

**Rh<sub>8</sub>-CH<sub>4</sub>**

**Energy: -580763.6291467**

|                |          |          |          |
|----------------|----------|----------|----------|
| Rh             | 2.09587  | -0.34221 | -1.21162 |
| Rh             | -0.44441 | 0.18366  | -1.68258 |
| Rh             | 1.82239  | -0.54856 | 1.34972  |
| Rh             | 0.79729  | 1.55186  | 0.21815  |
| Rh             | 0.18939  | -1.84502 | -0.16760 |
| Rh             | -0.76413 | -0.27985 | 1.68580  |
| Rh             | -1.76040 | 1.52652  | 0.08180  |
| Rh             | -2.27595 | -0.99411 | -0.27551 |
| C              | 1.46236  | 3.47245  | 0.13176  |
| H              | 2.54898  | 3.48379  | 0.23335  |
| H              | 1.17832  | 3.94087  | -0.81054 |
| H              | 1.80505  | 1.39951  | -1.10443 |
| H              | 0.99153  | 3.98768  | 0.97392  |
| Frequencies -- | 45.3995  | 55.2413  | 69.5116  |
| Frequencies -- | 74.3981  | 88.6235  | 96.2326  |

**Rh<sub>9</sub>-CH<sub>4</sub>**

**Energy: -650184.5320584**

|                |          |          |          |
|----------------|----------|----------|----------|
| Rh             | 0.87999  | 1.00552  | -1.32660 |
| Rh             | 0.23622  | -1.50204 | -1.28711 |
| Rh             | 2.57018  | -0.56390 | -0.08553 |
| Rh             | -1.55918 | 0.40867  | 1.35357  |
| Rh             | -1.98504 | -1.79678 | 0.08711  |
| Rh             | 0.33320  | -1.46280 | 1.25934  |
| Rh             | 0.97908  | 1.04987  | 1.27061  |
| Rh             | -1.65939 | 0.37254  | -1.27918 |
| Rh             | -0.78346 | 2.48227  | -0.01908 |
| C              | 4.51690  | -0.02297 | 0.25769  |
| H              | 4.69720  | -0.43461 | 1.25941  |
| H              | 5.16260  | -0.52053 | -0.47124 |
| H              | 2.80057  | 0.34562  | -1.37851 |
| H              | 4.71590  | 1.04649  | 0.25381  |
| Frequencies -- | 42.4789  | 63.2288  | 65.5290  |
| Frequencies -- | 74.5193  | 84.6139  | 87.7824  |

## 6. Cartesian Coordinates, Energies, and Normal Modes of Vibration for the Pre-Reaction Complexes (A) of the reaction $\text{CH}_4 + \text{Rh}_m\text{V}$ Cluster [B3LYP(D3BJ)]

(Spin Multiplicities ( $M=2S+1$ ) are included within parenthesis, energies are in kcal/mol)

Only first six normal vibrational modes are included

**Rh<sub>2</sub>V-CH<sub>4</sub>**  
**Energy: -756600.4720897**

|                |          |          |          |
|----------------|----------|----------|----------|
| Rh             | -1.10204 | -0.21402 | -0.00005 |
| Rh             | 1.58579  | -0.47287 | 0.00002  |
| V              | 0.70092  | 1.35781  | 0.00000  |
| C              | -3.78783 | -0.03512 | 0.00011  |
| H              | -3.35269 | -1.04076 | -0.00030 |
| H              | -4.39413 | 0.08369  | -0.89541 |
| H              | -4.39397 | 0.08305  | 0.89583  |
| H              | -3.02252 | 0.76531  | 0.00032  |
| Frequencies -- | 37.8941  | 48.1557  | 69.2867  |
| Frequencies -- | 126.3883 | 145.7481 | 185.8202 |

**Rh<sub>3</sub>V-CH<sub>4</sub>**  
**Energy: -826036.2469099**

|                |          |          |          |
|----------------|----------|----------|----------|
| Rh             | 1.22930  | -1.39993 | -0.11263 |
| Rh             | -1.49374 | -0.13520 | -0.28577 |
| Rh             | 1.09267  | 1.49740  | -0.14118 |
| V              | 0.17325  | 0.01730  | 0.95184  |
| C              | -4.12475 | 0.12965  | 0.23681  |
| H              | -3.62541 | -0.85092 | 0.19361  |
| H              | -4.58509 | 0.22491  | 1.21741  |
| H              | -3.42333 | 0.97050  | 0.10830  |
| H              | -4.87291 | 0.17744  | -0.55121 |
| Frequencies -- | 9.7427   | 37.8181  | 46.7904  |
| Frequencies -- | 62.2641  | 89.2254  | 135.1716 |

**Rh<sub>4</sub>V-CH<sub>4</sub>**  
**Energy: -895455.8769029**

|                |          |          |          |
|----------------|----------|----------|----------|
| Rh             | -1.59603 | 0.04003  | -0.12094 |
| Rh             | 0.43148  | 1.50141  | -0.48847 |
| Rh             | 1.64285  | -0.69117 | -0.72889 |
| Rh             | 0.49448  | 0.03694  | 1.53324  |
| V              | -0.17675 | -1.54141 | -0.16326 |
| C              | -3.96759 | -0.44315 | -0.50411 |
| H              | -4.66470 | 0.38108  | -0.38127 |
| H              | -4.49817 | -1.37210 | -0.69387 |
| H              | -3.32179 | -0.24229 | -1.37921 |
| H              | -3.42000 | -0.57984 | 0.46180  |
| Frequencies -- | 3.6842   | 48.2607  | 104.5048 |
| Frequencies -- | 126.7238 | 131.1744 | 133.9607 |

**Rh<sub>5</sub>V-CH<sub>4</sub>**  
**Energy: -964885.5265279**

|    |          |          |          |
|----|----------|----------|----------|
| Rh | 1.49187  | 1.10864  | -0.06170 |
| Rh | -0.67086 | -1.40968 | -0.93537 |
| Rh | 1.63517  | -1.34572 | 0.11392  |
| Rh | -0.28932 | -0.27975 | 1.37137  |
| Rh | -2.40353 | 0.83467  | 0.09086  |
| V  | -0.56743 | 0.70621  | -0.84362 |
| C  | 2.37258  | 3.28590  | -0.66144 |
| H  | 1.65763  | 3.16725  | 0.18429  |
| H  | 2.45762  | 2.38905  | -1.32378 |

|                |         |          |          |
|----------------|---------|----------|----------|
| H              | 1.99343 | 4.09449  | -1.28402 |
| H              | 3.35662 | 3.52428  | -0.26317 |
| Frequencies -- | 30.8476 | 48.4882  | 67.2109  |
| Frequencies -- | 79.4271 | 119.8003 | 127.7355 |

**Rh<sub>6</sub>-CH<sub>4</sub>**

**Energy: -1034324.2565350**

|                |          |          |          |
|----------------|----------|----------|----------|
| Rh             | 2.52711  | 0.74865  | -0.45296 |
| Rh             | 0.50118  | 0.91081  | 1.29633  |
| Rh             | -1.02214 | -1.27106 | -1.32149 |
| Rh             | 1.12285  | -1.43968 | 0.23530  |
| Rh             | -1.65772 | 1.03925  | -0.28271 |
| Rh             | -1.24467 | -1.02134 | 1.20991  |
| V              | 0.53181  | 0.52028  | -1.14066 |
| C              | -2.24670 | 3.45015  | -0.45571 |
| H              | -1.60227 | 4.32426  | -0.51184 |
| H              | -3.29576 | 3.73283  | -0.49240 |
| H              | -2.01275 | 2.81935  | -1.33766 |
| H              | -2.03795 | 2.95778  | 0.51423  |
| Frequencies -- | 35.1237  | 52.7291  | 75.2855  |
| Frequencies -- | 84.8226  | 114.1890 | 115.8509 |

**Rh<sub>7</sub>-CH<sub>4</sub>**

**Energy: -1103756.6661474**

|                |          |          |          |
|----------------|----------|----------|----------|
| Rh             | -0.59603 | 1.88456  | -0.16561 |
| Rh             | -1.85751 | -0.14458 | 1.08726  |
| Rh             | 2.03312  | 1.45193  | 0.43565  |
| Rh             | -1.77361 | -0.03689 | -1.48245 |
| Rh             | 0.81062  | 0.07139  | -1.45238 |
| Rh             | -0.40540 | -1.91978 | -0.28681 |
| Rh             | 2.15438  | -1.33026 | 0.60340  |
| V              | 0.43897  | -0.04399 | 0.95723  |
| C              | -2.65833 | 0.20718  | 3.46854  |
| H              | -2.05688 | -0.65717 | 3.11848  |
| H              | -2.15814 | 0.60054  | 4.35051  |
| H              | -2.72220 | 1.02898  | 2.73639  |
| H              | -3.65975 | -0.14003 | 3.70949  |
| Frequencies -- | 26.0031  | 41.3717  | 52.0110  |
| Frequencies -- | 73.5301  | 89.0257  | 101.7104 |

**Rh<sub>8</sub>-CH<sub>4</sub>**

**Energy: -1173196.1375004**

|                |          |          |          |
|----------------|----------|----------|----------|
| Rh             | -0.69761 | -0.55039 | -1.81837 |
| Rh             | 1.80650  | -0.31574 | 1.46233  |
| Rh             | -2.36654 | -1.04884 | 0.08819  |
| Rh             | -1.81761 | 1.44989  | -0.36876 |
| Rh             | 0.06890  | -1.93223 | 0.34474  |
| Rh             | -0.81880 | 0.13436  | 1.80041  |
| Rh             | 2.20946  | 1.75403  | -0.27867 |
| Rh             | 1.89537  | -0.82074 | -1.17062 |
| V              | 0.35017  | 0.81624  | -0.16912 |
| C              | -2.06689 | 4.10521  | 0.12053  |
| H              | -1.38912 | 4.75377  | 0.67198  |
| H              | -2.42278 | 3.33084  | 0.81420  |
| H              | -2.91907 | 4.66378  | -0.26068 |
| H              | -1.50603 | 3.68165  | -0.72533 |
| Frequencies -- | 14.2219  | 38.6532  | 52.5091  |
| Frequencies -- | 76.9998  | 84.5936  | 90.0473  |

**7. Cartesian Coordinates, Energies, and Normal Modes of Vibration for the Transition States (T.S) of the reaction  $\text{CH}_4 + \text{Rh}_m\text{V}$  Cluster [B3LYP(D3BJ)]**  
 (Spin Multiplicities ( $M=2S+1$ ) are included within parenthesis, energies are in kcal/mol)  
 Only first six normal vibrational modes are included

**Rh<sub>2</sub>V-CH<sub>4</sub>**  
**Energy: -756586.6932869**

|                |           |          |          |
|----------------|-----------|----------|----------|
| Rh             | -1.16761  | -0.20482 | -0.18777 |
| Rh             | 1.49751   | -0.49859 | 0.08079  |
| V              | 0.72362   | 1.36543  | -0.00554 |
| C              | -3.16882  | -0.04317 | 0.46099  |
| H              | -3.26286  | -1.12928 | 0.59299  |
| H              | -1.91064  | 0.90245  | 0.63674  |
| H              | -3.73672  | 0.29714  | -0.40824 |
| H              | -3.56553  | 0.43723  | 1.35388  |
| Frequencies -- | -856.7023 | 42.3892  | 88.8727  |
| Frequencies -- | 104.5257  | 133.1932 | 182.8241 |

**Rh<sub>3</sub>V-CH<sub>4</sub>**  
**Energy: -826024.4818290**

|                |           |          |          |
|----------------|-----------|----------|----------|
| Rh             | 1.20768   | -1.33847 | -0.08825 |
| Rh             | -1.59486  | -0.32895 | -0.27287 |
| Rh             | 1.07624   | 1.48175  | -0.18207 |
| V              | 0.13088   | 0.07408  | 0.94610  |
| C              | -3.38358  | 0.72110  | 0.21776  |
| H              | -2.95139  | 1.70384  | 0.01431  |
| H              | -2.75971  | -0.58786 | 0.75248  |
| H              | -3.90875  | 0.76643  | 1.17067  |
| H              | -4.09607  | 0.44253  | -0.56087 |
| Frequencies -- | -880.8845 | 41.0179  | 53.2234  |
| Frequencies -- | 74.0852   | 98.9240  | 123.1954 |

**Rh<sub>4</sub>V-CH<sub>4</sub>**  
**Energy: -895446.2982031**

|                |           |          |          |
|----------------|-----------|----------|----------|
| Rh             | -1.91687  | 0.15810  | 0.09237  |
| Rh             | 0.17677   | -1.11552 | -1.01613 |
| Rh             | 2.10525   | -0.28781 | 0.63452  |
| Rh             | 0.42560   | 1.44842  | -0.53169 |
| V              | 0.05216   | -0.12565 | 1.19418  |
| C              | -3.69799  | -0.55428 | 0.97538  |
| H              | -4.50495  | -0.61107 | 0.24303  |
| H              | -3.79548  | 0.36471  | 1.57133  |
| H              | -3.76457  | -1.40615 | 1.64894  |
| H              | -2.53058  | -1.27541 | 0.15937  |
| Frequencies -- | -800.9858 | 65.9815  | 72.5367  |
| Frequencies -- | 94.6478   | 106.5512 | 114.8858 |

**Rh<sub>5</sub>V-CH<sub>4</sub>**  
**Energy: -964874.6277678**

|    |          |          |          |
|----|----------|----------|----------|
| Rh | -0.82952 | -1.61089 | 0.03760  |
| Rh | -0.02284 | 1.62483  | -1.06998 |
| Rh | -2.01353 | 0.68316  | 0.23779  |
| Rh | 0.21891  | 0.57464  | 1.35807  |
| Rh | 2.52182  | -0.32082 | 0.11120  |
| V  | 0.76744  | -0.36547 | -0.90011 |
| C  | -1.15671 | -3.47845 | -0.91455 |
| H  | -0.25836 | -3.90679 | -0.45282 |
| H  | -1.11775 | -3.67422 | -1.98359 |
| H  | -2.05427 | -3.93312 | -0.49524 |

|                |           |          |          |
|----------------|-----------|----------|----------|
| H              | -1.64820  | -2.00089 | -1.23874 |
| Frequencies -- | -848.0368 | 31.5906  | 62.2766  |
| Frequencies -- | 82.2665   | 93.1710  | 99.0822  |

**Rh<sub>6</sub>V-CH<sub>4</sub>**

**Energy: -1034310.4495571**

|                |           |          |          |
|----------------|-----------|----------|----------|
| Rh             | 2.51668   | 0.62635  | -0.52280 |
| Rh             | 0.49756   | 1.14671  | 1.16056  |
| Rh             | -0.98053  | -1.48751 | -1.16367 |
| Rh             | 1.08240   | -1.38269 | 0.49763  |
| Rh             | -1.63237  | 1.05033  | -0.52046 |
| Rh             | -1.29596  | -0.77191 | 1.29545  |
| V              | 0.54875   | 0.25046  | -1.25182 |
| C              | -2.17328  | 3.09456  | -0.52416 |
| H              | -3.12253  | 3.07603  | 0.01449  |
| H              | -2.32659  | 3.12825  | -1.60989 |
| H              | -1.61644  | 3.98328  | -0.23315 |
| H              | -0.96556  | 2.32696  | 0.16336  |
| Frequencies -- | -893.8228 | 41.5006  | 67.8114  |
| Frequencies -- | 87.1801   | 96.2458  | 115.6889 |

**Rh<sub>7</sub>V-CH<sub>4</sub>**

**Energy: -1103741.3470348**

|                |           |          |          |
|----------------|-----------|----------|----------|
| Rh             | -0.55454  | 1.87875  | 0.27321  |
| Rh             | -1.87314  | -0.30620 | 1.11687  |
| Rh             | 2.09428   | 1.31044  | 0.64101  |
| Rh             | -1.79848  | 0.33549  | -1.43032 |
| Rh             | 0.76016   | 0.36728  | -1.42490 |
| Rh             | -0.47624  | -1.77826 | -0.60984 |
| Rh             | 2.14551   | -1.49673 | 0.28034  |
| V              | 0.53871   | -0.25117 | 0.94027  |
| C              | -2.65578  | -0.84093 | 3.00040  |
| H              | -1.17862  | -0.30970 | 2.54143  |
| H              | -3.42030  | -0.06792 | 3.11246  |
| H              | -3.08649  | -1.79257 | 2.67462  |
| H              | -2.15997  | -0.99121 | 3.95601  |
| Frequencies -- | -818.9992 | 46.5437  | 57.3253  |
| Frequencies -- | 61.5699   | 88.5435  | 96.4583  |

**Rh<sub>8</sub>V-CH<sub>4</sub>**

**Energy: -1173180.1723731**

|                |           |          |          |
|----------------|-----------|----------|----------|
| Rh             | -0.64653  | -0.53412 | -1.80467 |
| Rh             | 1.71383   | -0.28426 | 1.51374  |
| Rh             | -2.40237  | -1.01344 | 0.01337  |
| Rh             | -1.85183  | 1.51397  | -0.42994 |
| Rh             | 0.00734   | -1.87679 | 0.37683  |
| Rh             | -0.90859  | 0.17310  | 1.76077  |
| Rh             | 2.49686   | 1.59431  | -0.26647 |
| Rh             | 1.91692   | -0.84808 | -1.09943 |
| V              | 0.45485   | 1.01455  | -0.21613 |
| C              | -2.54041  | 3.42540  | 0.13193  |
| H              | -2.32445  | 4.00437  | 1.02766  |
| H              | -1.82031  | 2.23660  | 0.96265  |
| H              | -3.62174  | 3.31597  | 0.02929  |
| H              | -2.10593  | 3.94507  | -0.72888 |
| Frequencies -- | -875.2599 | 41.4309  | 53.4191  |
| Frequencies -- | 59.8400   | 81.9028  | 96.2957  |



## 8. Cartesian Coordinates, Energies, and Normal Modes of Vibration for the Post Reaction Complexes (B) of the reaction $\text{CH}_4 + \text{Rh}_m\text{V}$ Cluster [B3LYP(D3BJ)]

(Spin Multiplicities ( $M=2S+1$ ) are included within parenthesis, energies are in kcal/mol)

Only first six normal vibrational modes are included

**Rh<sub>2</sub>V-CH<sub>4</sub>**  
**Energy: -756598.410057**

|                |          |          |          |
|----------------|----------|----------|----------|
| Rh             | -1.26439 | -0.25166 | -0.36569 |
| Rh             | 1.44415  | -0.48461 | 0.12576  |
| V              | 0.65214  | 1.35814  | -0.03840 |
| C              | -2.34697 | 0.06255  | 1.28392  |
| H              | -2.01342 | 0.89263  | 1.90712  |
| H              | -1.35174 | 1.27699  | -0.77357 |
| H              | -2.25094 | -0.87379 | 1.85142  |
| H              | -3.39063 | 0.22396  | 0.99159  |
| Frequencies -- | 50.6779  | 72.6745  | 93.7369  |
| Frequencies -- | 112.3240 | 194.2780 | 356.9713 |

**Rh<sub>3</sub>V-CH<sub>4</sub>**  
**Energy: -826035.2566497**

|                |          |          |          |
|----------------|----------|----------|----------|
| Rh             | 1.36133  | -1.25292 | -0.07153 |
| Rh             | -1.69095 | -0.41300 | -0.30333 |
| Rh             | 0.98004  | 1.51243  | -0.17805 |
| V              | 0.10445  | 0.02634  | 0.89679  |
| C              | -3.17686 | 0.78741  | 0.36902  |
| H              | -2.92292 | 1.79847  | 0.03222  |
| H              | -2.26096 | -1.46185 | 0.67348  |
| H              | -3.32474 | 0.78663  | 1.44834  |
| H              | -4.10173 | 0.45363  | -0.11327 |
| Frequencies -- | 42.8684  | 49.5970  | 55.2780  |
| Frequencies -- | 115.8102 | 127.2337 | 140.0738 |

**Rh<sub>4</sub>V-CH<sub>4</sub>**  
**Energy: -895458.4481983**

|                |          |          |          |
|----------------|----------|----------|----------|
| Rh             | -2.13180 | 0.39272  | 0.41674  |
| Rh             | -0.21292 | 0.08371  | -1.48377 |
| Rh             | 1.37414  | -1.58837 | 0.20354  |
| Rh             | 1.49215  | 1.44663  | 0.34815  |
| V              | 0.18095  | -0.04574 | 0.81730  |
| C              | -2.80852 | -1.47491 | 0.60649  |
| H              | -3.76285 | -1.55158 | 0.07673  |
| H              | -2.96626 | -1.61168 | 1.68700  |
| H              | -2.11932 | -2.23369 | 0.23733  |
| H              | -1.93315 | 0.23713  | -1.24786 |
| Frequencies -- | 32.5253  | 51.4148  | 66.6830  |
| Frequencies -- | 99.9934  | 107.3728 | 117.7210 |

**Rh<sub>5</sub>V-CH<sub>4</sub>**  
**Energy: -964884.4960570**

|    |          |          |          |
|----|----------|----------|----------|
| Rh | -0.07597 | 1.80128  | 0.05916  |
| Rh | 0.84156  | -1.53483 | -1.08233 |
| Rh | 2.09261  | 0.23693  | 0.32959  |
| Rh | 0.01492  | -0.73372 | 1.32059  |
| Rh | -2.42879 | -0.49774 | 0.10014  |
| V  | -0.74335 | -0.03752 | -0.93701 |
| C  | -0.45716 | 3.43819  | -1.12066 |
| H  | -1.53906 | 3.60088  | -1.11986 |
| H  | -0.09781 | 3.35536  | -2.14523 |

|                |         |          |          |
|----------------|---------|----------|----------|
| H              | 0.04490 | 4.28081  | -0.63379 |
| H              | 1.43720 | 1.76074  | -0.54761 |
| Frequencies -- | 35.8737 | 58.9228  | 77.6635  |
| Frequencies -- | 93.2059 | 101.3893 | 115.7102 |

**Rh<sub>6</sub>V\_CH<sub>4</sub>**

**Energy: -1034316.9118316**

|                |          |          |          |
|----------------|----------|----------|----------|
| Rh             | 2.46984  | 0.75318  | -0.56624 |
| Rh             | 0.43551  | 1.23711  | 1.12597  |
| Rh             | -0.81378 | -1.59364 | -1.12182 |
| Rh             | 1.18417  | -1.27213 | 0.58454  |
| Rh             | -1.74239 | 0.93884  | -0.54083 |
| Rh             | -1.24585 | -0.77200 | 1.30961  |
| V              | 0.53622  | 0.19295  | -1.29087 |
| C              | -2.68460 | 2.73994  | -0.61184 |
| H              | -3.66041 | 2.53697  | -0.15460 |
| H              | -2.80241 | 2.93561  | -1.68548 |
| H              | -2.22138 | 3.60022  | -0.13466 |
| H              | -0.47892 | 1.93918  | -0.26928 |
| Frequencies -- | 40.0061  | 63.1128  | 87.3373  |
| Frequencies -- | 99.7349  | 109.6119 | 111.6370 |

**Rh<sub>7</sub>V\_CH<sub>4</sub>**

**Energy: -1103751.8599143**

|                |          |          |          |
|----------------|----------|----------|----------|
| Rh             | -0.91420 | 1.91083  | -0.20057 |
| Rh             | -1.44672 | -0.25731 | 1.41224  |
| Rh             | 1.67227  | 1.86509  | 0.35576  |
| Rh             | -1.89169 | -0.22937 | -1.25445 |
| Rh             | 0.63862  | 0.15500  | -1.49091 |
| Rh             | -0.34128 | -2.00983 | -0.27882 |
| Rh             | 2.19127  | -1.39722 | 0.22208  |
| V              | 0.83376  | 0.02218  | 0.95003  |
| C              | -1.53238 | -0.38022 | 3.46223  |
| H              | -1.07877 | 1.37797  | 1.48059  |
| H              | -2.46267 | 0.12042  | 3.74979  |
| H              | -1.60743 | -1.45086 | 3.68304  |
| H              | -0.70533 | 0.05042  | 4.02292  |
| Frequencies -- | 48.1835  | 53.8431  | 64.9210  |
| Frequencies -- | 82.5731  | 89.5770  | 93.0932  |

**Rh<sub>8</sub>V\_CH<sub>4</sub>**

**Energy: -1173189.0483691**

|                |          |          |          |
|----------------|----------|----------|----------|
| Rh             | -0.77358 | 0.08603  | -1.81213 |
| Rh             | 1.71589  | -0.81397 | 1.30441  |
| Rh             | -2.48205 | -0.89627 | -0.11851 |
| Rh             | -1.78501 | 1.66648  | 0.10533  |
| Rh             | -0.15107 | -1.88351 | -0.15344 |
| Rh             | -0.85882 | -0.28787 | 1.84301  |
| Rh             | 2.60778  | 1.42873  | 0.11944  |
| Rh             | 1.78342  | -0.61614 | -1.37547 |
| V              | 0.54255  | 1.01356  | 0.06618  |
| C              | -1.55855 | 3.70498  | 0.09938  |
| H              | -0.55110 | 4.09426  | 0.23943  |
| H              | -0.97638 | 1.49092  | 1.56092  |
| H              | -2.20814 | 4.09247  | 0.89148  |
| H              | -1.93718 | 4.02417  | -0.87925 |
| Frequencies -- | 47.4868  | 61.0233  | 69.4520  |
| Frequencies -- | 82.6962  | 90.2790  | 97.2459  |

## 9. Ionization Energies (eV) of $Rh_n$ and $Rh_mV$ Clusters

| Pristine        | I.E(eV)     |             | Ground State<br>(Neutral) | Ground State<br>(Cation) |
|-----------------|-------------|-------------|---------------------------|--------------------------|
|                 | B3LYP       | TPSSh       | M=2S+1                    | M=2S+1                   |
| Rh <sub>2</sub> | 7.502235966 | 7.274289419 | 5                         | 6                        |
| Rh <sub>3</sub> | 7.04601634  | 6.891866025 | 6                         | 7                        |
| Rh <sub>4</sub> | 6.369741357 | 6.23050267  | 7                         | 8                        |
| Rh <sub>5</sub> | 5.737929148 | 5.804732153 | 8                         | 9                        |
| Rh <sub>6</sub> | 5.953195369 | 5.887018217 | 7                         | 10                       |
| Rh <sub>7</sub> | 6.010120781 | 5.879943357 | 14                        | 11                       |
| Rh <sub>8</sub> | 5.754990445 | 5.903263184 | 13                        | 14                       |
| Rh <sub>9</sub> | 6.318992842 | 6.192216793 | 18                        | 15                       |

| Doped             | IP          |             | Ground State<br>(Neutral) | Ground State<br>(Cation) |
|-------------------|-------------|-------------|---------------------------|--------------------------|
|                   | B3LYP       | TPSSH       | M=2S+1                    | M=2S+1                   |
| Rh <sub>1</sub> V | 7.065390572 | 6.818097004 | 3                         | 4                        |
| Rh <sub>2</sub> V | 6.054365867 | 5.781385115 | 4                         | 1                        |
| Rh <sub>3</sub> V | 6.207890329 | 5.765330625 | 1                         | 2                        |
| Rh <sub>4</sub> V | 6.162964968 | 5.72573862  | 2                         | 3                        |
| Rh <sub>5</sub> V | 5.917276849 | 5.754908812 | 5                         | 4                        |
| Rh <sub>6</sub> V | 5.999671757 | 5.812895453 | 8                         | 5                        |
| Rh <sub>7</sub> V | 5.971481161 | 5.9265558   | 9                         | 10                       |
| Rh <sub>8</sub> V | 6.024705877 | 5.745684283 | 12                        | 9                        |

## 10. Table of Binding Energies per atom (eV) of Rh<sub>n</sub> and Rh<sub>m</sub>V Clusters

### Pristine Cluster (Rh<sub>n</sub>) B3LYP

| <b>Rh2</b> |                  |             |               |                   |                         |
|------------|------------------|-------------|---------------|-------------------|-------------------------|
|            | <b>E_Cluster</b> | <b>E_Rh</b> | <b>-Ebin</b>  | <b>-E_bin(ev)</b> | <b>-E_bin(kcal/mol)</b> |
| E          | -221.128958      | -110.531751 | -0.032728     | -0.890561608      | -20.53714728            |
| U          | -221.12622       | -110.530335 | -0.032775     | -0.891840525      | -20.56664025            |
| H          | -221.125276      | -110.52939  | -0.033248     | -0.904711328      | -20.86345248            |
| G          | -221.155148      | -110.549611 | -0.027963     | -0.760901193      | -17.54706213            |
| <b>Rh3</b> |                  |             |               |                   |                         |
| E          | -331.755775      | -110.531751 | -0.0535073333 | -1.4559880473     | -33.57638674            |
| U          | -331.751141      | -110.530335 | -0.0533786667 | -1.4524868987     | -33.49564712            |
| H          | -331.750196      | -110.52939  | -0.0540086667 | -1.4696298287     | -33.89097842            |
| G          | -331.789843      | -110.549611 | -0.0470033333 | -1.2790077033     | -29.4950617             |
| <b>Rh4</b> |                  |             |               |                   |                         |
| E          | -442.39157       | -110.531751 | -0.0661415    | -1.7997763565     | -41.504452665           |
| U          | -442.384879      | -110.530335 | -0.06588475   | -1.7927899323     | -41.3433394725          |
| H          | -442.383935      | -110.52939  | -0.06659375   | -1.8120825312     | -41.7882440625          |
| G          | -442.429296      | -110.549611 | -0.057713     | -1.570428443      | -36.21548463            |
| <b>Rh5</b> |                  |             |               |                   |                         |
| E          | -553.009463      | -110.531751 | -0.0701416    | -1.9086230776     | -44.014555416           |
| U          | -553.001447      | -110.530335 | -0.0699544    | -1.9035291784     | -43.897085544           |
| H          | -553.000503      | -110.52939  | -0.0707106    | -1.9241061366     | -44.371608606           |
| G          | -553.048066      | -110.549611 | -0.0600022    | -1.6327198642     | -37.651980522           |
| <b>Rh6</b> |                  |             |               |                   |                         |
| E          | -663.670938      | -110.531751 | -0.080072     | -2.178839192      | -50.24598072            |
| U          | -663.660852      | -110.530335 | -0.079807     | -2.171628277      | -50.07969057            |
| H          | -663.659908      | -110.52939  | -0.0805946667 | -2.1930614747     | -50.57395928            |
| G          | -663.709801      | -110.549611 | -0.0686891667 | -1.8691009142     | -43.103138975           |
| <b>Rh7</b> |                  |             |               |                   |                         |
| E          | -774.313418      | -110.531751 | -0.0844515714 | -2.2980117101     | -52.9942055871          |
| U          | -774.300585      | -110.530335 | -0.0840342857 | -2.2866569486     | -52.7323546286          |
| H          | -774.29964       | -110.52939  | -0.0848442857 | -2.3086978586     | -53.2406377286          |
| G          | -774.361683      | -110.549611 | -0.0734865714 | -1.9996430951     | -46.1135584371          |
| <b>Rh8</b> |                  |             |               |                   |                         |
| E          | -884.932302      | -110.531751 | -0.08478675   | -2.3071322543     | -53.2045334925          |

|            |             |             |               |               |                |
|------------|-------------|-------------|---------------|---------------|----------------|
| U          | -884.917709 | -110.530335 | -0.084378625  | -2.2960267649 | -52.9484309737 |
| H          | -884.916765 | -110.52939  | -0.085205625  | -2.3185302619 | -53.4673817438 |
| G          | -884.982619 | -110.549611 | -0.073216375  | -1.9922907801 | -45.9440074763 |
| <b>Rh9</b> |             |             |               |               |                |
| E          | -995.615213 | -110.531751 | -0.0921615556 | -2.5078080882 | -57.8322977267 |
| U          | -995.598868 | -110.530335 | -0.0917614444 | -2.4969206648 | -57.5812240033 |
| H          | -995.597923 | -110.52939  | -0.0926014444 | -2.5197779048 | -58.1083324033 |
| G          | -995.667597 | -110.549611 | -0.080122     | -2.180199742  | -50.27735622   |

## TPSSh

| <b>Rh2</b> | <b>E_Cluster(a.u)</b> | <b>E_Rh(a.u)</b> | <b>-E_bin(a.u)</b> | <b>-E_bin(eV)</b> | <b>-E_bin(kcal/mol)</b> |
|------------|-----------------------|------------------|--------------------|-------------------|-------------------------|
| E          | -220.969194           | -110.449211      | -0.035386          | -0.962888446      | -22.20506886            |
| U          | -220.966459           | -110.447794      | -0.0354355         | -0.9642353905     | -22.236130605           |
| H          | -220.965515           | -110.44685       | -0.0359075         | -0.9770789825     | -22.532315325           |
| G          | -220.99538            | -110.467071      | -0.030619          | -0.833173609      | -19.21372869            |
| <b>Rh3</b> |                       |                  |                    |                   |                         |
| E          | -331.521778           | -110.449211      | -0.0580483333      | -1.5795531983     | -36.42590965            |
| U          | -331.517295           | -110.447794      | -0.057971          | -1.577448881      | -36.37738221            |
| H          | -331.51635            | -110.44685       | -0.0586            | -1.5945646        | -36.772086              |
| G          | -331.554839           | -110.467071      | -0.0512086667      | -1.3934390287     | -32.13395042            |
| <b>Rh4</b> |                       |                  |                    |                   |                         |
| E          | -442.0929             | -110.449211      | -0.074014          | -2.013994954      | -46.44452514            |
| U          | -442.086389           | -110.447794      | -0.07380325        | -2.0082602357     | -46.3122774075          |
| H          | -442.085445           | -110.44685       | -0.07451125        | -2.0275256238     | -46.7565544875          |
| G          | -442.130087           | -110.467071      | -0.06545075        | -1.7809803582     | -41.0710001325          |
| <b>Rh5</b> |                       |                  |                    |                   |                         |
| E          | -552.647614           | -110.449211      | -0.0803118         | -2.1853643898     | -50.396457618           |
| U          | -552.639683           | -110.447794      | -0.0801426         | -2.1807602886     | -50.290282926           |
| H          | -552.638739           | -110.44685       | -0.0808978         | -2.2013100358     | -50.764178478           |
| G          | -552.686007           | -110.467071      | -0.0701304         | -1.9083183144     | -44.007527304           |
| <b>Rh6</b> |                       |                  |                    |                   |                         |
| E          | -663.239871           | -110.449211      | -0.0907675         | -2.4698744425     | -56.957513925           |
| U          | -663.230054           | -110.447794      | -0.0905483333      | -2.4639106983     | -56.81998465            |
| H          | -663.22911            | -110.44685       | -0.091335          | -2.485316685      | -57.31362585            |
| G          | -663.278172           | -110.467071      | -0.079291          | -2.157587401      | -49.75589541            |
| <b>Rh7</b> |                       |                  |                    |                   |                         |
| E          | -773.808867           | -110.449211      | -0.0949128571      | -2.5826737557     | -59.5587669857          |

|            |             |             |               |               |                |
|------------|-------------|-------------|---------------|---------------|----------------|
| U          | -773.796347 | -110.447794 | -0.0945412857 | -2.5725629256 | -59.3256021986 |
| H          | -773.795403 | -110.44685  | -0.0953504286 | -2.5945805119 | -59.8333474329 |
| G          | -773.856276 | -110.467071 | -0.0838255714 | -2.2809776241 | -52.6013843271 |
| <b>Rh8</b> |             |             |               |               |                |
| E          | -884.35534  | -110.449211 | -0.0952065    | -2.5906640715 | -59.743030815  |
| U          | -884.341215 | -110.447794 | -0.094857875  | -2.5811776366 | -59.5242651413 |
| H          | -884.340271 | -110.44685  | -0.095683875  | -2.6036539226 | -60.0425884013 |
| G          | -884.403977 | -110.467071 | -0.083426125  | -2.2701082874 | -52.3507276988 |
| <b>Rh9</b> |             |             |               |               |                |
| E          | -994.958061 | -110.449211 | -0.1016846667 | -2.7669414647 | -63.80814518   |
| U          | -994.94244  | -110.447794 | -0.101366     | -2.758270226  | -63.60817866   |
| H          | -994.941496 | -110.44685  | -0.1022051111 | -2.7811032784 | -64.1347292733 |
| G          | -995.007673 | -110.467071 | -0.0893371111 | -2.4309521304 | -56.0599305933 |

### Doped Cluster ( $Rh_mV$ ) B3LYP

| <b>RhV</b>  | <b>E_Cluster<br/>(a.u)</b> | <b>E_Rh<br/>(a.u)</b> | <b>E_V<br/>(a.u)</b> | <b>-E_bin<br/>(a.u)</b> | <b>-E_bin<br/>(eV)</b> | <b>-E_bin<br/>(kcal/mol)</b> |
|-------------|----------------------------|-----------------------|----------------------|-------------------------|------------------------|------------------------------|
| E           | -1054.562802               | -110.531751           | -943.91194           | -0.0595555              | -1.6205647105          | -37.371671805                |
| U           | -1054.560171               | -110.530335           | -943.910524          | -0.059656               | -1.623299416           | -37.43473656                 |
| H           | -1054.559227               | -110.52939            | -943.90958           | -0.0601285              | -1.6361566135          | -37.731235035                |
| G           | -1054.588036               | -110.549611           | -943.928805          | -0.05481                | -1.49143491            | -34.3938231                  |
| <b>Rh2V</b> |                            |                       |                      |                         |                        |                              |
| E           | -1165.164998               | -110.531751           | -943.91194           | -0.0631853333           | -1.7193361053          | -39.64942852                 |
| U           | -1165.161223               | -110.530335           | -943.910524          | -0.063343               | -1.723626373           | -39.74836593                 |
| H           | -1165.160279               | -110.52939            | -943.90958           | -0.063973               | -1.740769303           | -40.14369723                 |
| G           | -1165.196232               | -110.549611           | -943.928805          | -0.0560683333           | -1.5256754183          | -35.18343985                 |
| <b>Rh3V</b> |                            |                       |                      |                         |                        |                              |
| E           | -1275.820927               | -110.531751           | -943.91194           | -0.0784335              | -2.1342539685          | -49.217805585                |
| U           | -1275.81486                | -110.530335           | -943.910524          | -0.07833275             | -2.1315124602          | -49.1545839525               |
| H           | -1275.813916               | -110.52939            | -943.90958           | -0.0790415              | -2.1507982565          | -49.599331665                |
| G           | -1275.855776               | -110.549611           | -943.928805          | -0.0695345              | -1.8921032795          | -43.633594095                |
| <b>Rh4V</b> |                            |                       |                      |                         |                        |                              |
| E           | -1386.449928               | -110.531751           | -943.91194           | -0.0821968              | -2.2366571248          | -51.579313968                |
| U           | -1386.441732               | -110.530335           | -943.910524          | -0.0819736              | -2.2305836296          | -51.439253736                |
| H           | -1386.440788               | -110.52939            | -943.90958           | -0.0827296              | -2.2511551456          | -51.913651296                |

|             |              |             |             |               |               |                |
|-------------|--------------|-------------|-------------|---------------|---------------|----------------|
| G           | -1386.488227 | -110.549611 | -943.928805 | -0.0721956    | -1.9645144716 | -45.303460956  |
| <b>Rh5V</b> |              |             |             |               |               |                |
| E           | -1497.087501 | -110.531751 | -943.91194  | -0.0861343333 | -2.3438013443 | -54.05015551   |
| U           | -1497.077287 | -110.530335 | -943.910524 | -0.085848     | -2.336009928  | -53.87047848   |
| H           | -1497.076343 | -110.52939  | -943.90958  | -0.0866355    | -2.3574385905 | -54.364642605  |
| G           | -1497.130854 | -110.549611 | -943.928805 | -0.0756656667 | -2.0589384557 | -47.48096249   |
| <b>Rh6V</b> |              |             |             |               |               |                |
| E           | -1607.742843 | -110.531751 | -943.91194  | -0.0914852857 | -2.4894061096 | -57.4079316386 |
| U           | -1607.730811 | -110.530335 | -943.910524 | -0.0911824286 | -2.4811650639 | -57.2178857528 |
| H           | -1607.729867 | -110.52939  | -943.90958  | -0.0919924286 | -2.5032059739 | -57.7261688529 |
| G           | -1607.787898 | -110.549611 | -943.928805 | -0.0802038571 | -2.1824271567 | -50.3287223957 |
| <b>Rh7V</b> |              |             |             |               |               |                |
| E           | -1718.390681 | -110.531751 | -943.91194  | -0.0945605    | -2.5730857655 | -59.337659355  |
| U           | -1718.376522 | -110.530335 | -943.910524 | -0.094206625  | -2.5634564729 | -59.1155992538 |
| H           | -1718.375578 | -110.52939  | -943.90958  | -0.0950335    | -2.5859565685 | -59.634471585  |
| G           | -1718.439883 | -110.549611 | -943.928805 | -0.082975125  | -2.2578361264 | -52.0677206888 |
| <b>Rh8V</b> |              |             |             |               |               |                |
| E           | -1829.048398 | -110.531751 | -943.91194  | -0.09805      | -2.66803855   | -61.5273555    |
| U           | -1829.032221 | -110.530335 | -943.910524 | -0.0976685556 | -2.6576590652 | -61.2879952967 |
| H           | -1829.031276 | -110.52939  | -943.90958  | -0.0985084444 | -2.6805132818 | -61.8150339733 |
| G           | -1829.100446 | -110.549611 | -943.928805 | -0.0860836667 | -2.3424226537 | -54.01836167   |

## TPSSH

| <b>RhV</b>  | <b>E_Cluster<br/>(a.u)</b> | <b>E_Rh<br/>(a.u)</b> | <b>E_V<br/>(a.u)</b> | <b>-E_bin<br/>(a.u)</b> | <b>-E_bin<br/>(eV)</b> | <b>-E_bin<br/>(kcal/mol)</b> |
|-------------|----------------------------|-----------------------|----------------------|-------------------------|------------------------|------------------------------|
| E           | -1054.480104               | -110.449211           | -943.895969          | -0.067462               | -1.835708482           | -42.33307962                 |
| U           | -1054.477469               | -110.447794           | -943.894553          | -0.067561               | -1.838402371           | -42.39520311                 |
| H           | -1054.476525               | -110.44685            | -943.893609          | -0.068033               | -1.851245963           | -42.69138783                 |
| G           | -1054.50534                | -110.467071           | -943.912834          | -0.0627175              | -1.7066058925          | -39.355858425                |
| <b>Rh2V</b> |                            |                       |                      |                         |                        |                              |
| E           | -1165.019409               | -110.449211           | -943.895969          | -0.075006               | -2.040988266           | -47.06701506                 |
| U           | -1165.014795               | -110.447794           | -943.894553          | -0.0748846667           | -2.0376866647          | -46.99087718                 |
| H           | -1165.013851               | -110.44685            | -943.893609          | -0.075514               | -2.054811454           | -47.38579014                 |
| G           | -1165.052994               | -110.467071           | -943.912834          | -0.0686726667           | -1.8686519327          | -43.09278506                 |
| <b>Rh3V</b> |                            |                       |                      |                         |                        |                              |
| E           | -1275.605025               | -110.449211           | -943.895969          | -0.09035575             | -2.4586703132          | -56.6991366825               |
| U           | -1275.599015               | -110.447794           | -943.894553          | -0.09027                | -2.45633697            | -56.6453277                  |
| H           | -1275.598071               | -110.44685            | -943.893609          | -0.090978               | -2.475602358           | -57.08960478                 |

|             |              |             |             |               |               |                |
|-------------|--------------|-------------|-------------|---------------|---------------|----------------|
| G           | -1275.639545 | -110.467071 | -943.912834 | -0.0813745    | -2.2142815195 | -51.063312495  |
| <b>Rh4V</b> |              |             |             |               |               |                |
| E           | -1386.164718 | -110.449211 | -943.895969 | -0.094381     | -2.568201391  | -59.22502131   |
| U           | -1386.156688 | -110.447794 | -943.894553 | -0.0941918    | -2.5630530698 | -59.106296418  |
| H           | -1386.155744 | -110.44685  | -943.893609 | -0.094947     | -2.583602817  | -59.58019197   |
| G           | -1386.203488 | -110.467071 | -943.912834 | -0.084474     | -2.298622014  | -53.00827974   |
| <b>Rh5V</b> |              |             |             |               |               |                |
| E           | -1496.734883 | -110.449211 | -943.895969 | -0.0988098333 | -2.6887143748 | -62.004158515  |
| U           | -1496.72493  | -110.447794 | -943.894553 | -0.0985678333 | -2.6821293128 | -61.852301095  |
| H           | -1496.723986 | -110.44685  | -943.893609 | -0.0993545    | -2.7035352995 | -62.345942295  |
| G           | -1496.777112 | -110.467071 | -943.912834 | -0.0881538333 | -2.3987539588 | -55.317411955  |
| <b>Rh6V</b> |              |             |             |               |               |                |
| E           | -1607.323089 | -110.449211 | -943.895969 | -0.1045505714 | -2.8449255991 | -65.6065290771 |
| U           | -1607.311407 | -110.447794 | -943.894553 | -0.1042985714 | -2.8380684271 | -65.4483965571 |
| H           | -1607.310463 | -110.44685  | -943.893609 | -0.1051077143 | -2.8600860134 | -65.9561417914 |
| G           | -1607.367257 | -110.467071 | -943.912834 | -0.0931424286 | -2.5344986239 | -58.4478053529 |
| <b>Rh7V</b> |              |             |             |               |               |                |
| E           | -1717.911111 | -110.449211 | -943.895969 | -0.108833125  | -2.9614581644 | -68.2938742687 |
| U           | -1717.897523 | -110.447794 | -943.894553 | -0.1085515    | -2.9537948665 | -68.117151765  |
| H           | -1717.896579 | -110.44685  | -943.893609 | -0.1093775    | -2.9762711525 | -68.635475025  |
| G           | -1717.958    | -110.467071 | -943.912834 | -0.096958625  | -2.6383411449 | -60.8425067738 |
| <b>Rh8V</b> |              |             |             |               |               |                |
| E           | -1828.487953 | -110.449211 | -943.895969 | -0.1109217778 | -3.0182924951 | -69.6045247733 |
| U           | -1828.472122 | -110.447794 | -943.894553 | -0.1105796667 | -3.0089833097 | -69.38984663   |
| H           | -1828.471178 | -110.44685  | -943.893609 | -0.1114187778 | -3.0318163621 | -69.9163972433 |
| G           | -1828.539035 | -110.467071 | -943.912834 | -0.0988481111 | -2.6897559514 | -62.0281782033 |

**11. Thermochemical Data**  
**Rh<sub>n</sub> Cluster**  
**B3LYP**



| <b>Rh2</b> |                |            | <b>B3LYP/def2tzvp</b> | <b>D*H und</b>  |               |              |             |              |
|------------|----------------|------------|-----------------------|-----------------|---------------|--------------|-------------|--------------|
|            | <b>Cluster</b> | <b>CH4</b> | <b>P.R.C</b>          | <b>TS</b>       | <b>Po.R.C</b> | <b>Eb</b>    | <b>Ea</b>   | <b>Eh</b>    |
| E          | -221.128958    | -40.494851 | -261.6322             | -261.608374     | -261.631059   | -5.26543641  | 14.95105326 | 0.71598891   |
| U          | -221.12622     | -40.491983 | -261.625007           | -261.602341     | -261.624665   | -4.26957804  | 14.22314166 | 0.21460842   |
| H          | -221.125276    | -40.491038 | -261.624063           | -261.601397     | -261.623721   | -4.86257499  | 14.22314166 | 0.21460842   |
| G          | -221.155148    | -40.512165 | -261.669433           | -261.642495     | -261.665236   | -1.3303212   | 16.90386438 | 2.63365947   |
| <b>Rh3</b> |                |            | <b>B3LYP/def2tzvp</b> | <b>6-A" Cs</b>  |               |              |             |              |
|            | <b>Cluster</b> | <b>CH4</b> | <b>P.R.C</b>          | <b>TS</b>       | <b>Po.R.C</b> | <b>Eb</b>    | <b>Ea</b>   | <b>Eh</b>    |
| E          | -331.755775    | -40.494851 | -372.256928           | -372.235654     | -372.245421   | -3.95456802  | 13.34964774 | 7.22075757   |
| U          | -331.751141    | -40.491983 | -372.247867           | -372.227559     | -372.237468   | -2.97627993  | 12.74347308 | 6.52547649   |
| H          | -331.750196    | -40.491038 | -372.246923           | -372.226615     | -372.236524   | -3.56990439  | 12.74347308 | 6.52547649   |
| G          | -331.789843    | -40.512165 | -372.298638           | -372.274433     | -372.28383    | 2.1147087    | 15.18887955 | 9.29216808   |
| <b>Rh4</b> |                |            | <b>B3LYP/def2tzvp</b> | <b>7A C1</b>    |               |              |             |              |
|            | <b>Cluster</b> | <b>CH4</b> | <b>P.R.C</b>          | <b>TS</b>       | <b>Po.R.C</b> | <b>Eb</b>    | <b>Ea</b>   | <b>Eh</b>    |
| E          | -442.39157     | -40.494851 | -482.89351            | -482.874617     | -482.886817   | -4.44841839  | 11.85554643 | 4.19992443   |
| U          | -442.384879    | -40.491983 | -482.882662           | -482.864829     | -482.87693    | -3.639558    | 11.19038583 | 3.59688732   |
| H          | -442.383935    | -40.491038 | -482.881718           | -482.863885     | -482.875985   | -4.23255495  | 11.19038583 | 3.59751483   |
| G          | -442.429296    | -40.512165 | -482.937584           | -482.915944     | -482.928088   | 2.43285627   | 13.5793164  | 5.95883496   |
| <b>Rh5</b> |                |            | <b>B3LYP/def2tzvp</b> | <b>8A1 C2V</b>  |               |              |             |              |
|            | <b>Cluster</b> | <b>CH4</b> | <b>P.R.C</b>          | <b>TS</b>       | <b>Po.R.C</b> | <b>Eb</b>    | <b>Ea</b>   | <b>Eh</b>    |
| E          | -553.009463    | -40.494851 | -593.525803           | -593.511114     | -593.524685   | -13.48456239 | 9.21749439  | 0.70155618   |
| U          | -553.001447    | -40.491983 | -593.513159           | -593.499249     | -593.512587   | -12.38014479 | 8.7286641   | 0.3589357199 |
| H          | -553.000503    | -40.491038 | -593.512215           | -593.498305     | -593.511643   | -12.97314174 | 8.7286641   | 0.3589357199 |
| G          | -553.048066    | -40.512165 | -593.573089           | -593.556427     | -593.569921   | -8.06852358  | 10.45557162 | 1.98795168   |
| <b>Rh6</b> |                |            | <b>B3LYP/def2tzvp</b> | <b>7-A1G Oh</b> |               |              |             |              |
|            | <b>Cluster</b> | <b>CH4</b> | <b>P.R.C</b>          | <b>TS</b>       | <b>Po.R.C</b> | <b>Eb</b>    | <b>Ea</b>   | <b>Eh</b>    |
| E          | -663.670938    | -40.494851 | -704.173654           | -704.156107     | -704.165447   | -4.93536615  | 11.01091797 | 5.1499745701 |
| U          | -663.660852    | -40.491983 | -704.159474           | -704.142573     | -704.15164    | -4.16603889  | 10.60554651 | 4.91591334   |
| H          | -663.659908    | -40.491038 | -704.15853            | -704.141629     | -704.150695   | -4.75903584  | 10.60554651 | 4.91654085   |
| G          | -663.709801    | -40.512165 | -704.221988           | -704.202369     | -704.212618   | -0.01380522  | 12.31111869 | 5.8797687    |
| <b>Rh7</b> |                |            | <b>B3LYP/def2tzvp</b> | <b>14A C1</b>   |               |              |             |              |
|            | <b>Cluster</b> | <b>CH4</b> | <b>P.R.C</b>          | <b>TS</b>       | <b>Po.R.C</b> | <b>Eb</b>    | <b>Ea</b>   | <b>Eh</b>    |
| E          | -774.313418    | -40.494851 | -814.814449           | -814.793202     | -814.810092   | -3.8780118   | 13.33270497 | 2.7340610699 |
| U          | -774.300585    | -40.491983 | -814.797547           | -814.777484     | -814.794233   | -3.12437229  | 12.58973313 | 2.07956814   |
| H          | -774.29964     | -40.491038 | -814.796603           | -814.776539     | -814.793289   | -3.71799675  | 12.59036064 | 2.07956814   |
| G          | -774.361683    | -40.512165 | -814.867865           | -814.843836     | -814.860748   | 3.7543923299 | 15.07843779 | 4.4659886701 |
| <b>Rh8</b> |                |            | <b>B3LYP/def2tzvp</b> | <b>13A C1</b>   |               |              |             |              |
|            | <b>Cluster</b> | <b>CH4</b> | <b>P.R.C</b>          | <b>TS</b>       | <b>Po.R.C</b> | <b>Eb</b>    | <b>Ea</b>   | <b>Eh</b>    |

|            |                |            |                       |                |               |                |               |               |
|------------|----------------|------------|-----------------------|----------------|---------------|----------------|---------------|---------------|
| E          | -884.932302    | -40.494851 | -925.464657           | -925.445546    | -925.458266   | -23.5341350399 | 11.99234361   | 4.01041641    |
| U          | -884.917709    | -40.491983 | -925.446121           | -925.4283      | -925.440551   | -22.85956179   | 11.1828557099 | 3.4952307     |
| H          | -884.916765    | -40.491038 | -925.445177           | -925.427356    | -925.439607   | -23.4525587399 | 11.1828557099 | 3.4952307     |
| G          | -884.982619    | -40.512165 | -925.519562           | -925.497623    | -925.511754   | -15.54844278   | 13.76694189   | 4.89959808    |
| <b>Rh9</b> |                |            | <b>B3LYP/def2tzvp</b> | <b>18-A C1</b> |               |                |               |               |
|            | <b>Cluster</b> | <b>CH4</b> | <b>P.R.C</b>          | <b>TS</b>      | <b>Po.R.C</b> | <b>Eb</b>      | <b>Ea</b>     | <b>Eh</b>     |
| E          | -995.615213    | -40.494851 | -1036.118957          | -1036.085016   | -1036.087108  | -5.58044643    | 21.2983169099 | 19.98556599   |
| U          | -995.598868    | -40.491983 | -1036.097865          | -1036.065152   | -1036.06712   | -4.40135514    | 20.52773463   | 19.29279495   |
| H          | -995.597923    | -40.491038 | -1036.096921          | -1036.064208   | -1036.066176  | -4.9949796001  | 20.52773463   | 19.29279495   |
| G          | -995.667597    | -40.512165 | -1036.180025          | -1036.14179    | -1036.144059  | -0.1650351299  | 23.99284485   | 22.5690246599 |

## MN15

|            |                |            |              |                              |               |              |             |              |
|------------|----------------|------------|--------------|------------------------------|---------------|--------------|-------------|--------------|
| <b>Rh2</b> |                |            |              | <b>MN15<br/>def2tzvp+sdd</b> |               |              |             |              |
|            | <b>Cluster</b> | <b>CH4</b> | <b>P.R.C</b> | <b>TS</b>                    | <b>Po.R.C</b> | <b>Eb</b>    | <b>Ea</b>   | <b>Eh</b>    |
| E          | -220.533159    | -40.423087 | -260.980954  | -260.957064                  | -260.982326   | -15.50451708 | 14.9912139  | -0.86094372  |
| U          | -220.530459    | -40.420216 | -260.974131  | -260.951163                  | -260.976047   | -14.71887456 | 14.41264968 | -1.20230916  |
| H          | -220.529515    | -40.419272 | -260.973187  | -260.950219                  | -260.975103   | -15.311244   | 14.41264968 | -1.20230916  |
| G          | -220.559308    | -40.440398 | -261.018427  | -260.990313                  | -261.015992   | -11.74761471 | 17.64181614 | 1.52798685   |
| <b>Rh3</b> | <b>Cluster</b> | <b>CH4</b> | <b>P.R.C</b> | <b>TS</b>                    | <b>Po.R.C</b> | <b>Eb</b>    | <b>Ea</b>   | <b>Eh</b>    |
| E          | -330.882326    | -40.423087 | -371.320026  | -371.301983                  | -371.312309   | -9.16980363  | 11.32216293 | 4.84249467   |
| U          | -330.87751     | -40.420216 | -371.311738  | -371.294086                  | -371.304535   | -8.79267012  | 11.07680652 | 4.51995453   |
| H          | -330.876566    | -40.419272 | -371.310794  | -371.293142                  | -371.303591   | -9.38503956  | 11.07680652 | 4.51995453   |
| G          | -330.917179    | -40.440398 | -371.359061  | -371.340418                  | -371.350502   | -0.93122484  | 11.69866893 | 5.37085809   |
| <b>Rh4</b> | <b>Cluster</b> | <b>CH4</b> | <b>P.R.C</b> | <b>TS</b>                    | <b>Po.R.C</b> | <b>Eb</b>    | <b>Ea</b>   | <b>Eh</b>    |
| E          | -441.244286    | -40.423087 | -481.680884  | -481.664945                  | -481.672836   | -8.47828761  | 10.00188189 | 5.05020048   |
| U          | -441.237575    | -40.420216 | -481.670571  | -481.65497                   | -481.663063   | -8.0195778   | 9.78978351  | 4.71134508   |
| H          | -441.236631    | -40.419272 | -481.669627  | -481.654026                  | -481.662119   | -8.61194724  | 9.78978351  | 4.71134508   |
| G          | -441.282173    | -40.440398 | -481.723332  | -481.707272                  | -481.713883   | -0.47753511  | 10.0778106  | 5.92934199   |
| <b>Rh5</b> | <b>Cluster</b> | <b>CH4</b> | <b>P.R.C</b> | <b>TS</b>                    | <b>Po.R.C</b> | <b>Eb</b>    | <b>Ea</b>   | <b>Eh</b>    |
| E          | -551.596669    | -40.423087 | -592.035951  | -592.019879                  | -592.031896   | -10.16252445 | 10.08534072 | 2.54455305   |
| U          | -551.588166    | -40.420216 | -592.023751  | -592.008158                  | -592.020111   | -9.64420119  | 9.78476343  | 2.2841363999 |
| H          | -551.587222    | -40.419272 | -592.022806  | -592.007214                  | -592.019167   | -10.23594312 | 9.78413592  | 2.2835088899 |
| G          | -551.637835    | -40.440398 | -592.081452  | -592.064547                  | -592.076577   | -2.01995469  | 10.60805655 | 3.05911125   |
| <b>Rh6</b> | <b>Cluster</b> | <b>CH4</b> | <b>P.R.C</b> | <b>TS</b>                    | <b>Po.R.C</b> | <b>Eb</b>    | <b>Ea</b>   | <b>Eh</b>    |
| E          | -661.970523    | -40.423087 | -702.408466  | -702.391891                  | -702.400211   | -9.32228856  | 10.40097825 | 5.18009505   |
| U          | -661.960686    | -40.420216 | -702.394844  | -702.378559                  | -702.386576   | -8.74874442  | 10.21900035 | 5.18825268   |
| H          | -661.959742    | -40.419272 | -702.3939    | -702.377614                  | -702.385631   | -9.34111386  | 10.21962786 | 5.18888019   |
| G          | -662.01017     | -40.440398 | -702.454989  | -702.4377                    | -702.446511   | -2.77422171  | 10.84902039 | 5.32002978   |

| <b>Rh7</b> | <b>Cluster</b> | <b>CH4</b> | <b>P.R.C</b> | <b>TS</b>    | <b>Po.R.C</b> | <b>Eb</b>     | <b>Ea</b>     | <b>Eh</b>    |
|------------|----------------|------------|--------------|--------------|---------------|---------------|---------------|--------------|
| E          | -772.31383     | -40.423087 | -812.749514  | -812.729227  | -812.742966   | -7.9047434699 | 12.73029537   | 4.10893548   |
| U          | -772.301655    | -40.420216 | -812.733409  | -812.713801  | -812.727416   | -7.2402103801 | 12.30421608   | 3.7606674301 |
| H          | -772.300711    | -40.419272 | -812.732465  | -812.712857  | -812.726472   | -7.8325798201 | 12.30421608   | 3.7606674301 |
| G          | -772.359721    | -40.440398 | -812.800864  | -812.779047  | -812.792921   | -0.46749495   | 13.69038567   | 4.98431193   |
| <b>Rh8</b> | <b>Cluster</b> | <b>CH4</b> | <b>P.R.C</b> | <b>TS</b>    | <b>Po.R.C</b> | <b>Eb</b>     | <b>Ea</b>     | <b>Eh</b>    |
| E          | -882.690678    | -40.423087 | -923.126522  | -923.108986  | -923.11888    | -8.00514507   | 11.00401536   | 4.79543142   |
| U          | -882.676946    | -40.420216 | -923.10878   | -923.092038  | -923.10151    | -7.29041118   | 10.50577242   | 4.5619977    |
| H          | -882.676002    | -40.419272 | -923.107835  | -923.091093  | -923.100566   | -7.88215311   | 10.50577242   | 4.56137019   |
| G          | -882.738183    | -40.440398 | -923.179612  | -923.160396  | -923.171611   | -0.64696281   | 12.05823216   | 5.02070751   |
| <b>Rh9</b> | <b>Cluster</b> | <b>CH4</b> | <b>P.R.C</b> | <b>TS</b>    | <b>Po.R.C</b> | <b>Eb</b>     | <b>Ea</b>     | <b>Eh</b>    |
| E          | -993.044552    | -40.423087 | -1033.481706 | -1033.453255 | -1033.453999  | -8.82718317   | 17.8532870101 | 17.38641957  |
| U          | -993.028695    | -40.420216 | -1033.461581 | -1033.434106 | -1033.434544  | -7.9505517    | 17.2408372501 | 16.96598787  |
| H          | -993.027751    | -40.419272 | -1033.460636 | -1033.433162 | -1033.433599  | -8.54229363   | 17.24020974   | 16.96598787  |
| G          | -993.095616    | -40.440398 | -1033.53932  | -1033.50802  | -1033.510089  | -2.07454806   | 19.6410630001 | 18.34274481  |

## TPSSh

| <b>Rh2</b> | <b>Cluster</b> | <b>CH4</b> | <b>P.R.C</b> | <b>TS</b>   | <b>Po.R.C</b> | <b>Eb</b>   | <b>Ea</b>   | <b>Eh</b>   |
|------------|----------------|------------|--------------|-------------|---------------|-------------|-------------|-------------|
| E          | -220.969194    | -40.492323 | -261.465381  | -261.448435 | -261.462111   | -2.42469864 | 10.63378446 | 2.0519577   |
| U          | -220.966459    | -40.489456 | -261.458407  | -261.442264 | -261.455772   | -1.56375492 | 10.12989393 | 1.65348885  |
| H          | -220.965515    | -40.488512 | -261.457463  | -261.44132  | -261.454828   | -2.15612436 | 10.12989393 | 1.65348885  |
| G          | -220.99538     | -40.509639 | -261.501301  | -261.482687 | -261.496751   | 2.33308218  | 11.68047114 | 2.8551705   |
| <b>Rh3</b> | <b>Cluster</b> | <b>CH4</b> | <b>P.R.C</b> | <b>TS</b>   | <b>Po.R.C</b> | <b>Eb</b>   | <b>Ea</b>   | <b>Eh</b>   |
| E          | -331.521778    | -40.492323 | -372.019629  | -372.001015 | -372.008069   | -3.46887528 | 11.68047114 | 7.2540156   |
| U          | -331.517295    | -40.489456 | -372.010897  | -371.993077 | -371.999724   | -2.60165646 | 11.1822282  | 7.01116923  |
| H          | -331.51635     | -40.488512 | -372.009952  | -371.992133 | -371.99878    | -3.1940259  | 11.18160069 | 7.01054172  |
| G          | -331.554839    | -40.509639 | -372.060152  | -372.039372 | -372.046932   | 2.71460826  | 13.0396578  | 8.2956822   |
| <b>Rh4</b> | <b>Cluster</b> | <b>CH4</b> | <b>P.R.C</b> | <b>TS</b>   | <b>Po.R.C</b> | <b>Eb</b>   | <b>Ea</b>   | <b>Eh</b>   |
| E          | -442.0929      | -40.492323 | -482.590097  | -482.575346 | -482.588428   | -3.05848374 | 9.25640001  | 1.04731419  |
| U          | -442.086389    | -40.489456 | -482.579586  | -482.565718 | -482.57866    | -2.34751491 | 8.70230868  | 0.58107426  |
| H          | -442.085445    | -40.488512 | -482.578642  | -482.564774 | -482.577715   | -2.93988435 | 8.70230868  | 0.58170177  |
| G          | -442.130087    | -40.509639 | -482.633156  | -482.616213 | -482.629351   | 4.1227407   | 10.63190193 | 2.38767555  |
| <b>Rh5</b> | <b>Cluster</b> | <b>CH4</b> | <b>P.R.C</b> | <b>TS</b>   | <b>Po.R.C</b> | <b>Eb</b>   | <b>Ea</b>   | <b>Eh</b>   |
| E          | -552.647614    | -40.492323 | -593.153687  | -593.138461 | -593.155254   | -8.6282625  | 9.55446726  | -0.98330817 |
| U          | -552.639683    | -40.489456 | -593.141477  | -593.126772 | -593.143363   | -7.74221838 | 9.22753455  | -1.18348386 |
| H          | -552.638739    | -40.488512 | -593.140533  | -593.125828 | -593.142419   | -8.33458782 | 9.22753455  | -1.18348386 |
| G          | -552.686007    | -40.509639 | -593.19907   | -593.182936 | -593.200438   | -2.14859424 | 10.12424634 | -0.85843368 |
| <b>Rh6</b> | <b>Cluster</b> | <b>CH4</b> | <b>P.R.C</b> | <b>TS</b>   | <b>Po.R.C</b> | <b>Eb</b>   | <b>Ea</b>   | <b>Eh</b>   |

|            |                |            |              |              |               |                |               |               |
|------------|----------------|------------|--------------|--------------|---------------|----------------|---------------|---------------|
| E          | -663.239871    | -40.492323 | -703.737499  | -703.722624  | -703.733191   | -3.32894055    | 9.33421125    | 2.70331308    |
| U          | -663.230054    | -40.489456 | -703.723755  | -703.70939   | -703.720048   | -2.66377995    | 9.01418115    | 2.32617957    |
| H          | -663.22911     | -40.488512 | -703.722811  | -703.708446  | -703.719104   | -3.25614939    | 9.01418115    | 2.32617957    |
| G          | -663.278172    | -40.509639 | -703.784603  | -703.76813   | -703.778476   | 2.0130520801   | 10.3369722299 | 3.84475377    |
| <b>Rh7</b> | <b>Cluster</b> | <b>CH4</b> | <b>P.R.C</b> | <b>TS</b>    | <b>Po.R.C</b> | <b>Eb</b>      | <b>Ea</b>     | <b>Eh</b>     |
| E          | -773.808867    | -40.492323 | -814.303884  | -814.286797  | -814.308464   | -1.6905119401  | 10.72226337   | -2.8739957999 |
| U          | -773.796347    | -40.489456 | -814.287484  | -814.27134   | -814.293224   | -1.05484431    | 10.13052144   | -3.6019074    |
| H          | -773.795403    | -40.488512 | -814.28654   | -814.270396  | -814.29228    | -1.64721375    | 10.13052144   | -3.6019074    |
| G          | -773.856276    | -40.509639 | -814.355939  | -814.336819  | -814.357707   | 6.26003976     | 11.9979912    | -1.10943768   |
| <b>Rh8</b> | <b>Cluster</b> | <b>CH4</b> | <b>P.R.C</b> | <b>TS</b>    | <b>Po.R.C</b> | <b>Eb</b>      | <b>Ea</b>     | <b>Eh</b>     |
| E          | -884.35534     | -40.492323 | -924.878153  | -924.862827  | -924.892187   | -19.1327799    | 9.61721826    | -8.80647534   |
| U          | -884.341215    | -40.489456 | -924.860129  | -924.84585   | -924.875688   | -18.48518958   | 8.96021529    | -9.76342809   |
| H          | -884.340271    | -40.488512 | -924.859185  | -924.844906  | -924.874744   | -19.07755902   | 8.96021529    | -9.76342809   |
| G          | -884.403977    | -40.509639 | -924.931667  | -924.91445   | -924.94207    | -11.3271830099 | 10.80383967   | -6.52798653   |
| <b>Rh9</b> | <b>Cluster</b> | <b>CH4</b> | <b>P.R.C</b> | <b>TS</b>    | <b>Po.R.C</b> | <b>Eb</b>      | <b>Ea</b>     | <b>Eh</b>     |
| E          | -994.958061    | -40.492323 | -1035.462379 | -1035.433636 | -1035.43912   | -7.52698245    | 18.03651993   | 14.59525509   |
| U          | -994.94244     | -40.489456 | -1035.442081 | -1035.414418 | -1035.419858  | -6.3911893499  | 17.3588091299 | 13.94515473   |
| H          | -994.941496    | -40.488512 | -1035.441137 | -1035.413473 | -1035.418914  | -6.98355879    | 17.35943664   | 13.94515473   |
| G          | -995.007673    | -40.509639 | -1035.520251 | -1035.488621 | -1035.493739  | -1.84425189    | 19.8481413    | 16.6365451199 |

## Rh<sub>m</sub>V Cluster B3LYP

|             |                 |            |                       |              |               |               |               |               |
|-------------|-----------------|------------|-----------------------|--------------|---------------|---------------|---------------|---------------|
| <b>RhV</b>  | <b>3-SG C*V</b> |            | <b>B3LYP/def2tzvp</b> |              |               |               |               |               |
|             | <b>Cluster</b>  | <b>CH4</b> | <b>P.R.C</b>          | <b>TS</b>    | <b>Po.R.C</b> | <b>Eb</b>     | <b>Ea</b>     | <b>Eh</b>     |
| E           | -1054.562802    | -40.494851 | -1095.060159          | -1095.018132 | -1095.030896  | -1.5725400602 | 26.3723627701 | 18.3628251301 |
| U           | -1054.560171    | -40.491983 | -1095.052767          | -1095.012662 | -1095.025127  | -0.38466363   | 25.1662885499 | 17.3443763999 |
| H           | -1054.559227    | -40.491038 | -1095.051822          | -1095.011717 | -1095.024182  | -0.97703307   | 25.1662885499 | 17.3443763999 |
| G           | -1054.588036    | -40.512165 | -1095.098901          | -1095.049875 | -1095.062727  | 0.8157630001  | 30.7643052601 | 22.69954674   |
| <b>Rh2V</b> | <b>4-A2 C2V</b> |            |                       |              |               |               |               |               |
|             | <b>Cluster</b>  | <b>CH4</b> | <b>P.R.C</b>          | <b>TS</b>    | <b>Po.R.C</b> | <b>Eb</b>     | <b>Ea</b>     | <b>Eh</b>     |
| E           | -1165.164998    | -40.494851 | -1205.672277          | -1205.655275 | -1205.673244  | -7.79869428   | 10.6689250199 | -0.6068021701 |
| U           | -1165.161223    | -40.491983 | -1205.663743          | -1205.647559 | -1205.665535  | -6.6120728701 | 10.15562184   | -1.12449792   |
| H           | -1165.160279    | -40.491038 | -1205.662799          | -1205.646615 | -1205.664591  | -7.2050698201 | 10.1556218399 | -1.12449792   |
| G           | -1165.196232    | -40.512165 | -1205.711131          | -1205.692397 | -1205.71034   | -1.7156123399 | 11.75577234   | 0.49636041    |
| <b>Rh3V</b> | <b>Cs 1-A</b>   |            |                       |              |               |               |               |               |
|             | <b>Cluster</b>  | <b>CH4</b> | <b>P.R.C</b>          | <b>TS</b>    | <b>Po.R.C</b> | <b>Eb</b>     | <b>Ea</b>     | <b>Eh</b>     |
| E           | -1275.820927    | -40.494851 | -1316.323959          | -1316.308998 | -1316.325234  | -5.1336593101 | 9.3881771101  | -0.8000752499 |
| U           | -1275.81486     | -40.491983 | -1316.313535          | -1316.299885 | -1316.315966  | -4.1992969201 | 8.5655115001  | -1.5254768099 |

|             |                |            |              |              |               |               |               |               |
|-------------|----------------|------------|--------------|--------------|---------------|---------------|---------------|---------------|
| H           | -1275.813916   | -40.491038 | -1316.312591 | -1316.298941 | -1316.315022  | -4.79229387   | 8.5655115001  | -1.5254768099 |
| G           | -1275.855776   | -40.512165 | -1316.366864 | -1316.348175 | -1316.364595  | 0.6758282701  | 11.72753439   | 1.42382019    |
| <b>Rh4V</b> | <b>C1 2-A</b>  |            |              |              |               |               |               |               |
|             | <b>Cluster</b> | <b>CH4</b> | <b>P.R.C</b> | <b>TS</b>    | <b>Po.R.C</b> | <b>Eb</b>     | <b>Ea</b>     | <b>Eh</b>     |
| E           | -1386.449928   | -40.494851 | -1426.950054 | -1426.939354 | -1426.958034  | -3.31011525   | 6.7143569999  | -5.0075298001 |
| U           | -1386.441732   | -40.491983 | -1426.93826  | -1426.928118 | -1426.946776  | -2.85203295   | 6.3642064199  | -5.3438751601 |
| H           | -1386.440788   | -40.491038 | -1426.937316 | -1426.927174 | -1426.945832  | -3.4450299    | 6.3642064201  | -5.3438751601 |
| G           | -1386.488227   | -40.512165 | -1426.994949 | -1426.981339 | -1427.001382  | 3.4155369302  | 8.5404111     | -4.03677183   |
| <b>Rh5V</b> | <b>C1 5-A</b>  |            |              |              |               |               |               |               |
|             | <b>Cluster</b> | <b>CH4</b> | <b>P.R.C</b> | <b>TS</b>    | <b>Po.R.C</b> | <b>Eb</b>     | <b>Ea</b>     | <b>Eh</b>     |
| E           | -1497.087501   | -40.494851 | -1537.591925 | -1537.578968 | -1537.59464   | -6.00715323   | 8.1306470699  | -1.7036896501 |
| U           | -1497.077287   | -40.491983 | -1537.578445 | -1537.565874 | -1537.581405  | -5.7574042501 | 7.8884282101  | -1.8574295999 |
| H           | -1497.076343   | -40.491038 | -1537.577501 | -1537.56493  | -1537.580461  | -6.3504012001 | 7.88842821    | -1.8574296    |
| G           | -1497.130854   | -40.512165 | -1537.638679 | -1537.625407 | -1537.64115   | 2.7233934001  | 8.3283127199  | -1.55057721   |
| <b>Rh6V</b> | <b>C1 8-A</b>  |            |              |              |               |               |               |               |
|             | <b>Cluster</b> | <b>CH4</b> | <b>P.R.C</b> | <b>TS</b>    | <b>Po.R.C</b> | <b>Eb</b>     | <b>Ea</b>     | <b>Eh</b>     |
| E           | -1607.742843   | -40.494851 | -1648.249083 | -1648.232214 | -1648.241542  | -7.14671139   | 10.5854661899 | 4.73205291    |
| U           | -1607.730811   | -40.491983 | -1648.233221 | -1648.216978 | -1648.22634   | -6.5430467701 | 10.19264493   | 4.31789631    |
| H           | -1607.729867   | -40.491038 | -1648.232277 | -1648.216033 | -1648.225396  | -7.13604372   | 10.1932724401 | 4.31789631    |
| G           | -1607.787898   | -40.512165 | -1648.2992   | -1648.281191 | -1648.290586  | 0.5415411301  | 11.3008275899 | 5.4053711399  |
| <b>Rh7V</b> | <b>C1 9-A</b>  |            |              |              |               |               |               |               |
|             | <b>Cluster</b> | <b>CH4</b> | <b>P.R.C</b> | <b>TS</b>    | <b>Po.R.C</b> | <b>Eb</b>     | <b>Ea</b>     | <b>Eh</b>     |
| E           | -1718.390681   | -40.494851 | -1758.895908 | -1758.876333 | -1758.892503  | -6.51104376   | 12.28350825   | 2.13667155    |
| U           | -1718.376522   | -40.491983 | -1758.877776 | -1758.858917 | -1758.875209  | -5.8176452101 | 11.83421109   | 1.61081817    |
| H           | -1718.375578   | -40.491038 | -1758.876832 | -1758.857973 | -1758.874264  | -6.4106421601 | 11.83421109   | 1.6114456799  |
| G           | -1718.439883   | -40.512165 | -1758.950103 | -1758.928803 | -1758.94502   | 1.2205069501  | 13.3659629999 | 3.1896333299  |
| <b>Rh8V</b> | <b>C1 12-A</b> |            |              |              |               |               |               |               |
|             | <b>Cluster</b> | <b>CH4</b> | <b>P.R.C</b> | <b>TS</b>    | <b>Po.R.C</b> | <b>Eb</b>     | <b>Ea</b>     | <b>Eh</b>     |
| E           | -1829.048398   | -40.494851 | -1869.553735 | -1869.533051 | -1869.546772  | -6.5800698601 | 12.97941684   | 4.36935213    |
| U           | -1829.032221   | -40.491983 | -1869.533388 | -1869.51369  | -1869.527604  | -5.7630518401 | 12.36069198   | 3.62951784    |
| H           | -1829.031276   | -40.491038 | -1869.532444 | -1869.512746 | -1869.52666   | -6.3566763001 | 12.3606919799 | 3.62951784    |
| G           | -1829.100446   | -40.512165 | -1869.611884 | -1869.588463 | -1869.601616  | 0.4561997701  | 14.6969117099 | 6.44327268    |

## MN15

|            |                |            |              |                          |               |             |             |             |
|------------|----------------|------------|--------------|--------------------------|---------------|-------------|-------------|-------------|
|            |                |            |              | <b>MN15/def2tzvp+sdd</b> |               |             |             |             |
| <b>RhV</b> | <b>Cluster</b> | <b>CH4</b> | <b>P.R.C</b> | <b>TS</b>                | <b>Po.R.C</b> | <b>Eb</b>   | <b>Ea</b>   | <b>Eh</b>   |
| E          | -181.856963    | -40.423087 | -222.284571  | -222.240555              | -222.245072   | -2.83697271 | 27.62048016 | 24.78601749 |
| U          | -181.854384    | -40.420216 | -222.2785    | -222.235233              | -222.239156   | -2.447289   | 27.15047517 | 24.68875344 |

|             |                |            |              |             |               |               |             |              |
|-------------|----------------|------------|--------------|-------------|---------------|---------------|-------------|--------------|
| H           | -181.85344     | -40.419272 | -222.277556  | -222.234288 | -222.238212   | -3.03965844   | 27.15110268 | 24.68875344  |
| G           | -181.882132    | -40.440398 | -222.318003  | -222.272056 | -222.277329   | 2.84073777    | 28.83220197 | 25.52334174  |
| <b>Rh2V</b> | <b>Cluster</b> | <b>CH4</b> | <b>P.R.C</b> | <b>TS</b>   | <b>Po.R.C</b> | <b>Eb</b>     | <b>Ea</b>   | <b>Eh</b>    |
| E           | -292.157978    | -40.423087 | -332.613426  | -332.602804 | -332.616788   | -20.30685111  | 6.66541122  | -2.10968862  |
| U           | -292.154084    | -40.420216 | -332.605165  | -332.595205 | -332.609329   | -19.36809615  | 6.2499996   | -2.61295164  |
| H           | -292.15314     | -40.419272 | -332.604221  | -332.594261 | -332.608385   | -19.96046559  | 6.2499996   | -2.61295164  |
| G           | -292.189152    | -40.440398 | -332.651193  | -332.639566 | -332.652913   | -13.58119893  | 7.29605877  | -1.0793172   |
| <b>Rh3V</b> | <b>Cluster</b> | <b>CH4</b> | <b>P.R.C</b> | <b>TS</b>   | <b>Po.R.C</b> | <b>Eb</b>     | <b>Ea</b>   | <b>Eh</b>    |
| E           | -402.531894    | -40.423087 | -442.965623  | -442.952588 | -442.962517   | -6.67796142   | 8.17959285  | 1.94904606   |
| U           | -402.525955    | -40.420216 | -442.955857  | -442.94364  | -442.953422   | -6.07806186   | 7.66628967  | 1.52798685   |
| H           | -402.52501     | -40.419272 | -442.954913  | -442.942696 | -442.952478   | -6.67105881   | 7.66628967  | 1.52798685   |
| G           | -402.566268    | -40.440398 | -443.005829  | -442.991071 | -443.000935   | 0.52522587    | 9.26079258  | 3.07103394   |
| <b>Rh4V</b> | <b>Cluster</b> | <b>CH4</b> | <b>P.R.C</b> | <b>TS</b>   | <b>Po.R.C</b> | <b>Eb</b>     | <b>Ea</b>   | <b>Eh</b>    |
| E           | -512.878643    | -40.423087 | -553.314955  | -553.309661 | -553.32105    | -8.29881975   | 3.32203794  | -3.82467345  |
| U           | -512.870582    | -40.420216 | -553.303174  | -553.298557 | -553.309794   | -7.76606376   | 2.89721367  | -4.1541162   |
| H           | -512.869637    | -40.419272 | -553.30223   | -553.297613 | -553.30885    | -8.35906071   | 2.89721367  | -4.1541162   |
| G           | -512.9165      | -40.440398 | -553.357749  | -553.351093 | -553.362612   | -0.53401101   | 4.17670656  | -3.05158113  |
| <b>Rh5V</b> | <b>Cluster</b> | <b>CH4</b> | <b>P.R.C</b> | <b>TS</b>   | <b>Po.R.C</b> | <b>Eb</b>     | <b>Ea</b>   | <b>Eh</b>    |
| E           | -623.228791    | -40.423087 | -663.66976   | -663.66361  | -663.665597   | -11.22113382  | 3.8591865   | 2.61232413   |
| U           | -623.218811    | -40.420216 | -663.656401  | -663.650438 | -663.652518   | -10.90235874  | 3.74184213  | 2.43662133   |
| H           | -623.217867    | -40.419272 | -663.655457  | -663.649494 | -663.651574   | -11.49472818  | 3.74184213  | 2.43662133   |
| G           | -623.271571    | -40.440398 | -663.715717  | -663.709138 | -663.71181    | -2.3519074801 | 4.12838829  | 2.45168157   |
| <b>Rh6V</b> | <b>Cluster</b> | <b>CH4</b> | <b>P.R.C</b> | <b>TS</b>   | <b>Po.R.C</b> | <b>Eb</b>     | <b>Ea</b>   | <b>Eh</b>    |
| E           | -733.603411    | -40.423087 | -774.045077  | -774.028885 | -774.032825   | -11.65850829  | 10.16064192 | 7.68825252   |
| U           | -733.591664    | -40.420216 | -774.029777  | -774.014014 | -774.017818   | -11.23054647  | 9.89144013  | 7.50439209   |
| H           | -733.590719    | -40.419272 | -774.028833  | -774.01307  | -774.016874   | -11.82354342  | 9.89144013  | 7.50439209   |
| G           | -733.647856    | -40.440398 | -774.093937  | -774.076772 | -774.081387   | -3.56613933   | 10.77120915 | 7.8752505    |
| <b>Rh7V</b> | <b>Cluster</b> | <b>CH4</b> | <b>P.R.C</b> | <b>TS</b>   | <b>Po.R.C</b> | <b>Eb</b>     | <b>Ea</b>   | <b>Eh</b>    |
| E           | -843.964425    | -40.423087 | -884.402242  | -884.385148 | -884.396704   | -9.2432223    | 10.72665594 | 3.47515038   |
| U           | -843.950696    | -40.420216 | -884.384121  | -884.36816  | -884.379797   | -8.28877959   | 10.01568711 | 2.71335324   |
| H           | -843.949752    | -40.419272 | -884.383177  | -884.367216 | -884.378852   | -8.88114903   | 10.01568711 | 2.71398075   |
| G           | -844.011879    | -40.440398 | -884.456042  | -884.436495 | -884.448234   | -2.36257515   | 12.26593797 | 4.89959808   |
| <b>Rh8V</b> | <b>Cluster</b> | <b>CH4</b> | <b>P.R.C</b> | <b>TS</b>   | <b>Po.R.C</b> | <b>Eb</b>     | <b>Ea</b>   | <b>Eh</b>    |
| E           | -954.32548     | -40.423087 | -994.777122  | -994.761542 | -994.771136   | -17.91854805  | 9.7766058   | 3.75627486   |
| U           | -954.309619    | -40.420216 | -994.757703  | -994.742362 | -994.752218   | -17.48744868  | 9.62663091  | 3.44189235   |
| H           | -954.308675    | -40.419272 | -994.756759  | -994.741418 | -994.751273   | -18.07981812  | 9.62663091  | 3.44251986   |
| G           | -954.376901    | -40.440398 | -994.832334  | -994.816275 | -994.825593   | -9.43461285   | 10.07718309 | 4.2300449099 |

# TPSSh

|             |                |            |              | TPSSh/def2tzvp |               |               |               |               |
|-------------|----------------|------------|--------------|----------------|---------------|---------------|---------------|---------------|
| <b>RhV</b>  | <b>Cluster</b> | <b>CH4</b> | <b>P.R.C</b> | <b>TS</b>      | <b>Po.R.C</b> | <b>Eb</b>     | <b>Ea</b>     | <b>Eh</b>     |
| E           | -1054.480104   | -40.492323 | -1094.972521 | -1094.936329   | -1094.974918  | -0.05898594   | 22.71084192   | -1.50414147   |
| U           | -1054.477469   | -40.489456 | -1094.967623 | -1094.930872   | -1094.969362  | -0.43800198   | 23.0616200101 | -1.09123989   |
| H           | -1054.476525   | -40.488512 | -1094.966679 | -1094.929928   | -1094.968418  | -1.0303714201 | 23.0616200101 | -1.0912398899 |
| G           | -1054.50534    | -40.509639 | -1095.005679 | -1094.968066   | -1095.006513  | 5.835843      | 23.6025336301 | -0.52334334   |
| <b>Rh2V</b> | <b>Cluster</b> | <b>CH4</b> | <b>P.R.C</b> | <b>TS</b>      | <b>Po.R.C</b> | <b>Eb</b>     | <b>Ea</b>     | <b>Eh</b>     |
| E           | -1165.019409   | -40.492323 | -1205.518133 | -1205.5042     | -1205.521292  | -4.0166915101 | 8.74309683    | -1.9823040899 |
| U           | -1165.014795   | -40.489456 | -1205.509854 | -1205.496571   | -1205.513602  | -3.5159385299 | 8.33521533    | -2.3519074801 |
| H           | -1165.013851   | -40.488512 | -1205.50891  | -1205.495626   | -1205.512658  | -4.1083079701 | 8.3358428401  | -2.3519074801 |
| G           | -1165.052994   | -40.509639 | -1205.555783 | -1205.540767   | -1205.558355  | 4.2984435     | 9.42269016    | -1.6139557199 |
| <b>Rh3V</b> | <b>Cluster</b> | <b>CH4</b> | <b>P.R.C</b> | <b>TS</b>      | <b>Po.R.C</b> | <b>Eb</b>     | <b>Ea</b>     | <b>Eh</b>     |
| E           | -1275.605025   | -40.492323 | -1316.104934 | -1316.093263   | -1316.10837   | -4.76029086   | 7.32366921    | -2.15612436   |
| U           | -1275.599015   | -40.489456 | -1316.094906 | -1316.084247   | -1316.099245  | -4.03802685   | 6.68862909    | -2.72276589   |
| H           | -1275.598071   | -40.488512 | -1316.093961 | -1316.083303   | -1316.098301  | -4.6297687802 | 6.6880015801  | -2.7233934    |
| G           | -1275.639545   | -40.509639 | -1316.145625 | -1316.131823   | -1316.146733  | 2.23330809    | 8.6608930201  | -0.69528108   |
| <b>Rh4V</b> | <b>Cluster</b> | <b>CH4</b> | <b>P.R.C</b> | <b>TS</b>      | <b>Po.R.C</b> | <b>Eb</b>     | <b>Ea</b>     | <b>Eh</b>     |
| E           | -1386.164718   | -40.492323 | -1426.660291 | -1426.656773   | -1426.671475  | -2.0394075    | 2.20758018    | -7.0180718401 |
| U           | -1386.156688   | -40.489456 | -1426.648531 | -1426.645713   | -1426.660229  | -1.49786637   | 1.7683231801  | -7.34061198   |
| H           | -1386.155744   | -40.488512 | -1426.647586 | -1426.644769   | -1426.659285  | -2.0896083001 | 1.76769567    | -7.3412394899 |
| G           | -1386.203488   | -40.509639 | -1426.702897 | -1426.698294   | -1426.713931  | 6.4194273002  | 2.8884285299  | -6.9239453401 |
| <b>Rh5V</b> | <b>Cluster</b> | <b>CH4</b> | <b>P.R.C</b> | <b>TS</b>      | <b>Po.R.C</b> | <b>Eb</b>     | <b>Ea</b>     | <b>Eh</b>     |
| E           | -1496.734883   | -40.492323 | -1537.237416 | -1537.227318   | -1537.239759  | -6.4068770999 | 6.33659598    | -1.4702559301 |
| U           | -1496.72493    | -40.489456 | -1537.223761 | -1537.214485   | -1537.226723  | -5.8829062499 | 5.82078276    | -1.85868462   |
| H           | -1496.723986   | -40.488512 | -1537.222817 | -1537.21354    | -1537.225779  | -6.4752756901 | 5.8214102701  | -1.85868462   |
| G           | -1496.777112   | -40.509639 | -1537.284605 | -1537.272322   | -1537.285678  | 1.34663646    | 7.70770533    | -0.6733182299 |
| <b>Rh6V</b> | <b>Cluster</b> | <b>CH4</b> | <b>P.R.C</b> | <b>TS</b>      | <b>Po.R.C</b> | <b>Eb</b>     | <b>Ea</b>     | <b>Eh</b>     |
| E           | -1607.323089   | -40.492323 | -1647.823892 | -1647.81038    | -1647.81945   | -5.3212848    | 8.47891512    | 2.78739942    |
| U           | -1607.311407   | -40.489456 | -1647.808516 | -1647.79546    | -1647.804557  | -4.8023340301 | 8.19277056    | 2.4843120901  |
| H           | -1607.310463   | -40.488512 | -1647.807572 | -1647.794516   | -1647.803613  | -5.39470347   | 8.19277056    | 2.4843120899  |
| G           | -1607.367257   | -40.509639 | -1647.872772 | -1647.858321   | -1647.867679  | 2.5878512402  | 9.06814701    | 3.19590843    |
| <b>Rh7V</b> | <b>Cluster</b> | <b>CH4</b> | <b>P.R.C</b> | <b>TS</b>      | <b>Po.R.C</b> | <b>Eb</b>     | <b>Ea</b>     | <b>Eh</b>     |
| E           | -1717.911111   | -40.492323 | -1758.41059  | -1758.393561   | -1758.403586  | -4.4904615601 | 10.6858677899 | 4.39508004    |
| U           | -1717.897523   | -40.489456 | -1758.39308  | -1758.376505   | -1758.386722  | -3.82843851   | 10.4009782501 | 3.9897085801  |
| H           | -1717.896579   | -40.488512 | -1758.392136 | -1758.375561   | -1758.385778  | -4.42080795   | 10.4009782499 | 3.9897085799  |
| G           | -1717.958      | -40.509639 | -1758.462839 | -1758.445493   | -1758.454704  | 3.0120480001  | 10.8847884601 | 5.10479385    |
| <b>Rh8V</b> | <b>Cluster</b> | <b>CH4</b> | <b>P.R.C</b> | <b>TS</b>      | <b>Po.R.C</b> | <b>Eb</b>     | <b>Ea</b>     | <b>Eh</b>     |

|   |              |            |              |              |              |               |               |              |
|---|--------------|------------|--------------|--------------|--------------|---------------|---------------|--------------|
| E | -1828.487953 | -40.492323 | -1868.984085 | -1868.964142 | -1868.977635 | -2.39018559   | 12.51443193   | 4.0474395001 |
| U | -1828.472122 | -40.489456 | -1868.96429  | -1868.944993 | -1868.958887 | -1.70180712   | 12.1090604699 | 3.3904365299 |
| H | -1828.471178 | -40.488512 | -1868.963346 | -1868.944049 | -1868.957943 | -2.2941765601 | 12.10906047   | 3.3904365301 |
| G | -1828.539035 | -40.509639 | -1869.040503 | -1869.0195   | -1869.031437 | 5.1273842101  | 13.1795925299 | 5.6890056599 |

## 12. Combined Plots of Properties with B3LYP and TPSSh functional



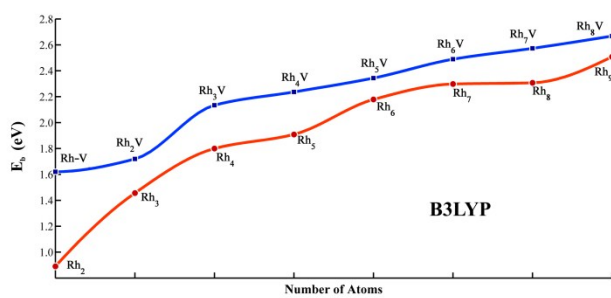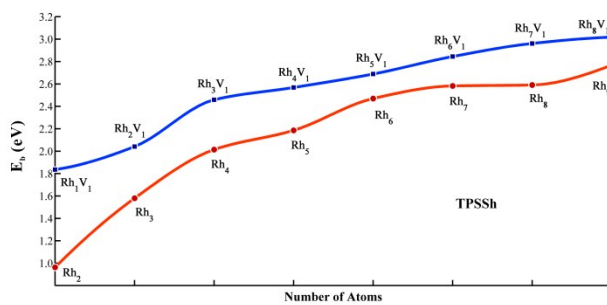

(a)

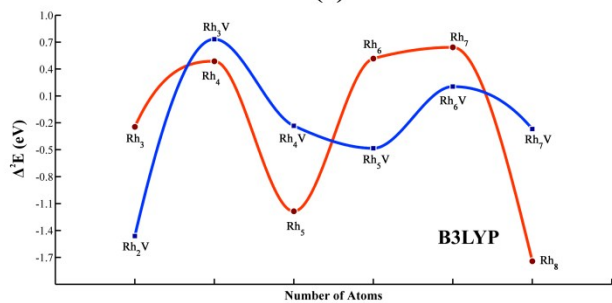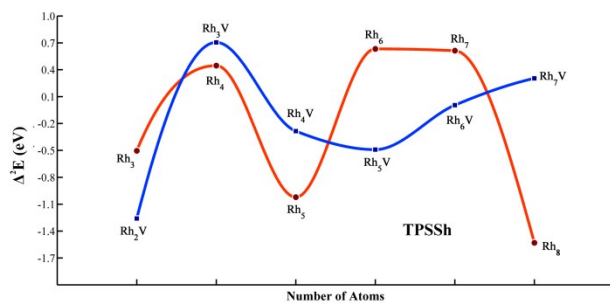

(b)

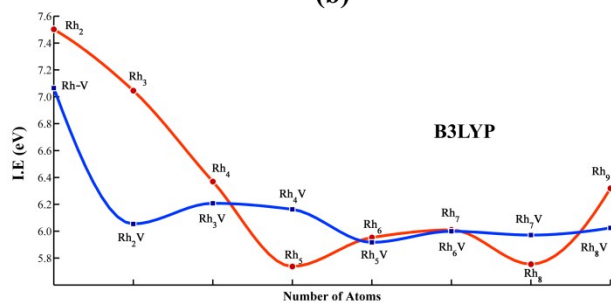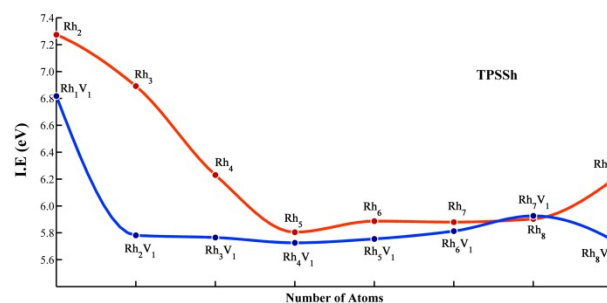

(c)

(Shape preserving interpolant was used for better visualization)

### 13. Sample IRC Plots

**Rh<sub>3</sub>+CH<sub>4</sub>**  
**(MN15)**

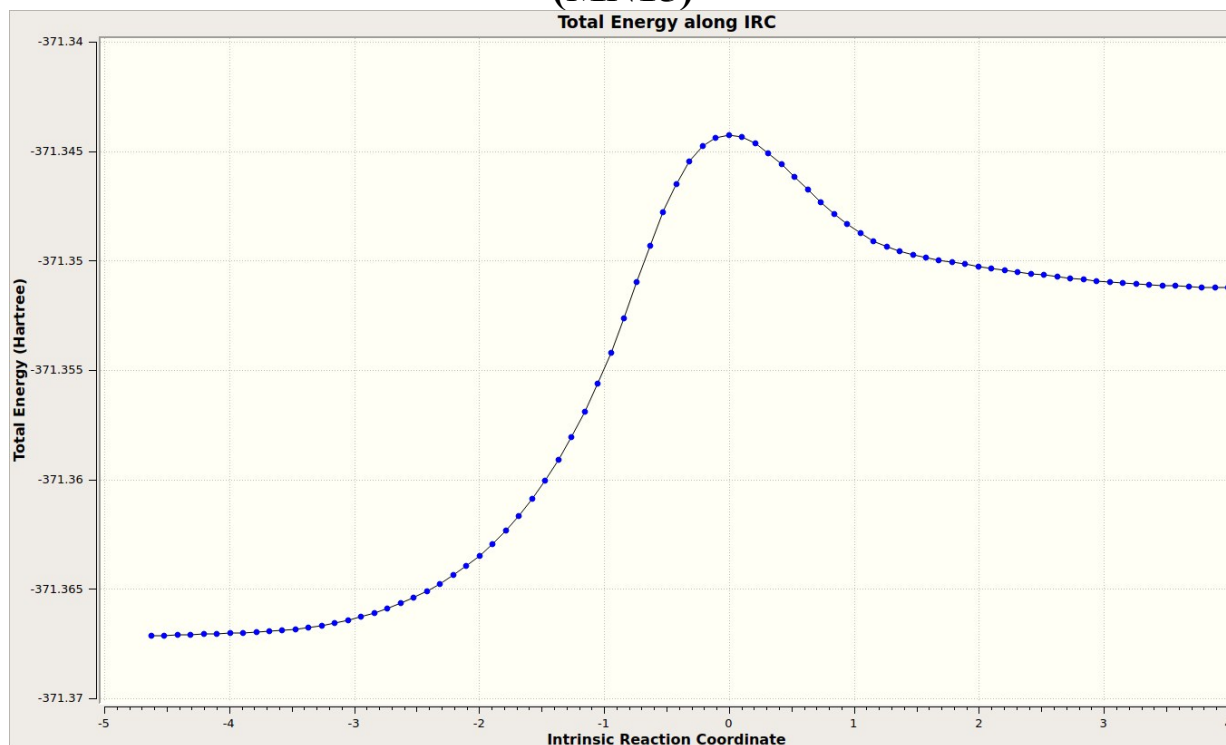

**Rh<sub>2</sub>V+CH<sub>4</sub>**  
**(B3LYP(D3BJ))**

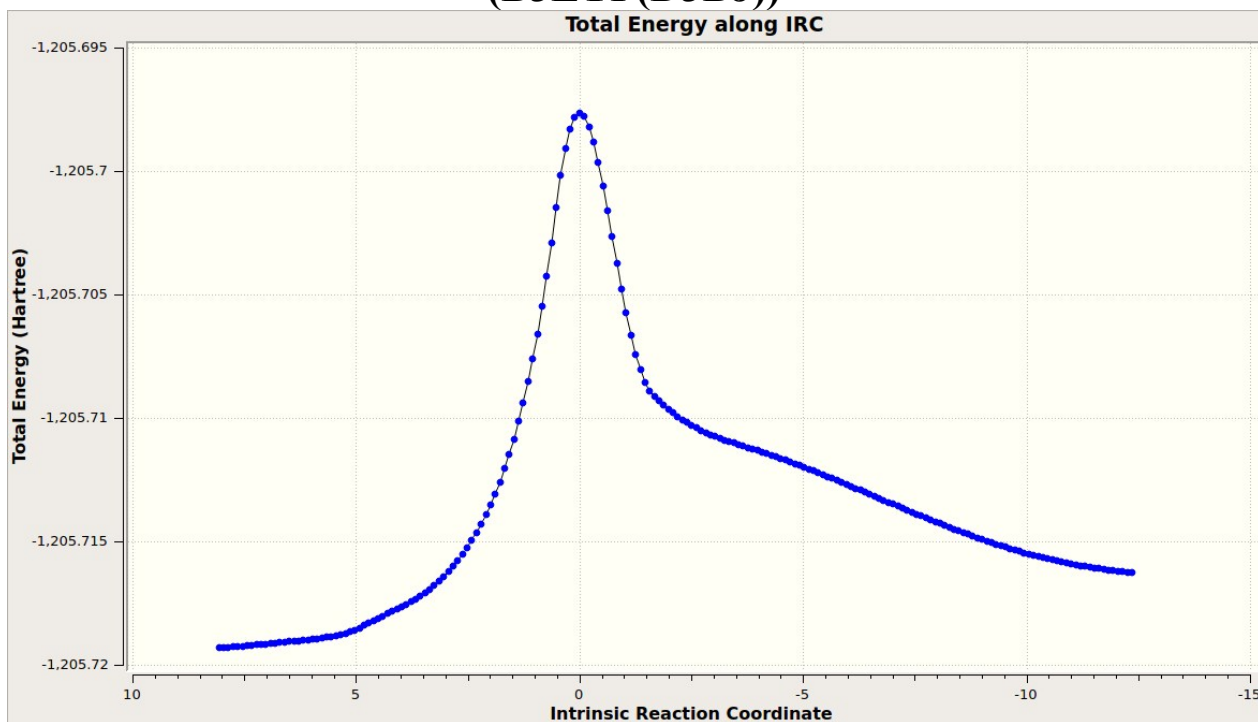

**Rh<sub>6</sub>+CH<sub>4</sub>**  
**(TPSSh)**

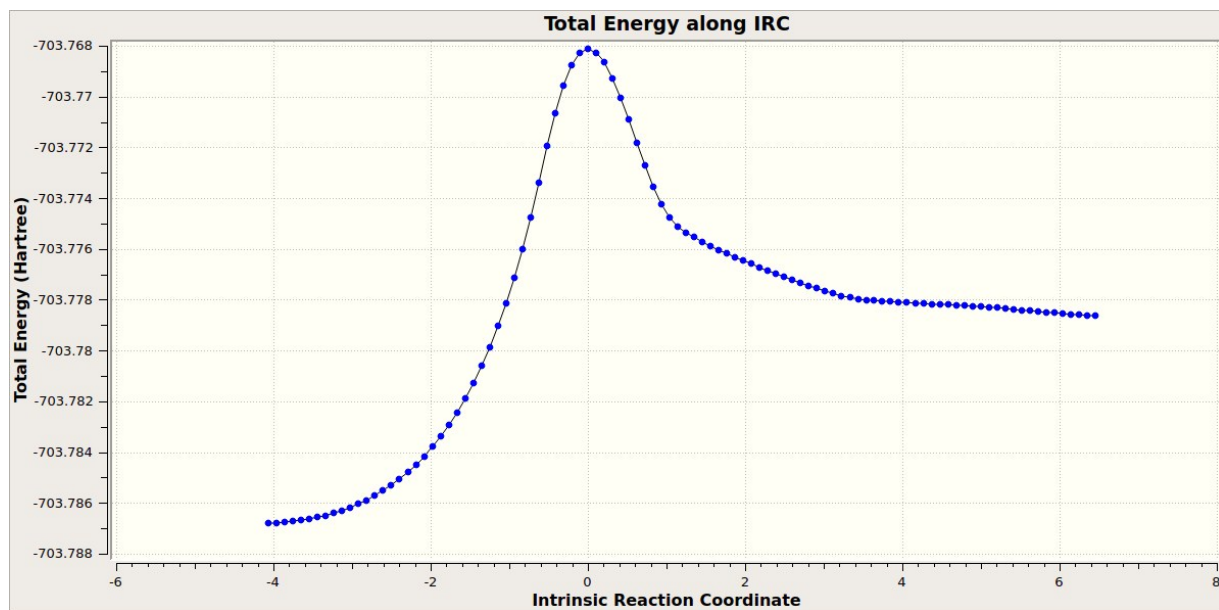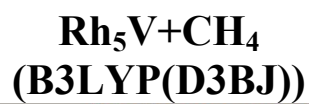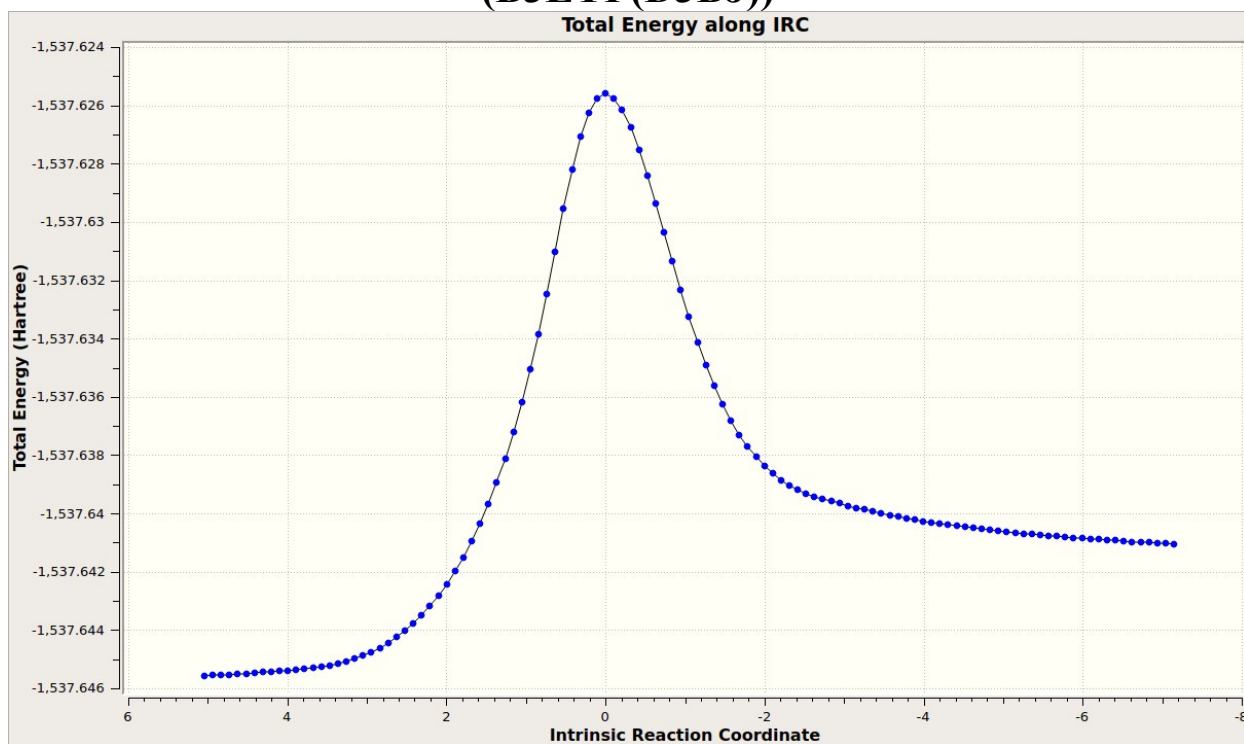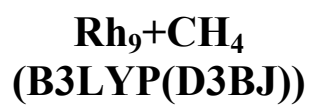

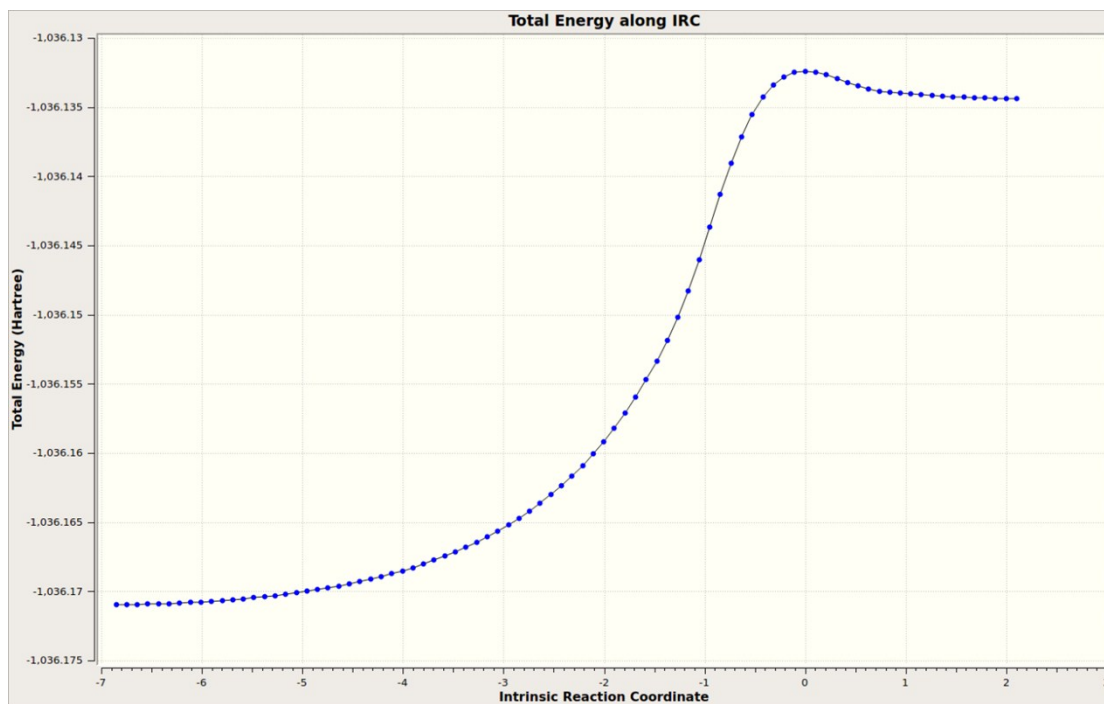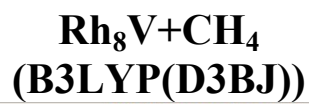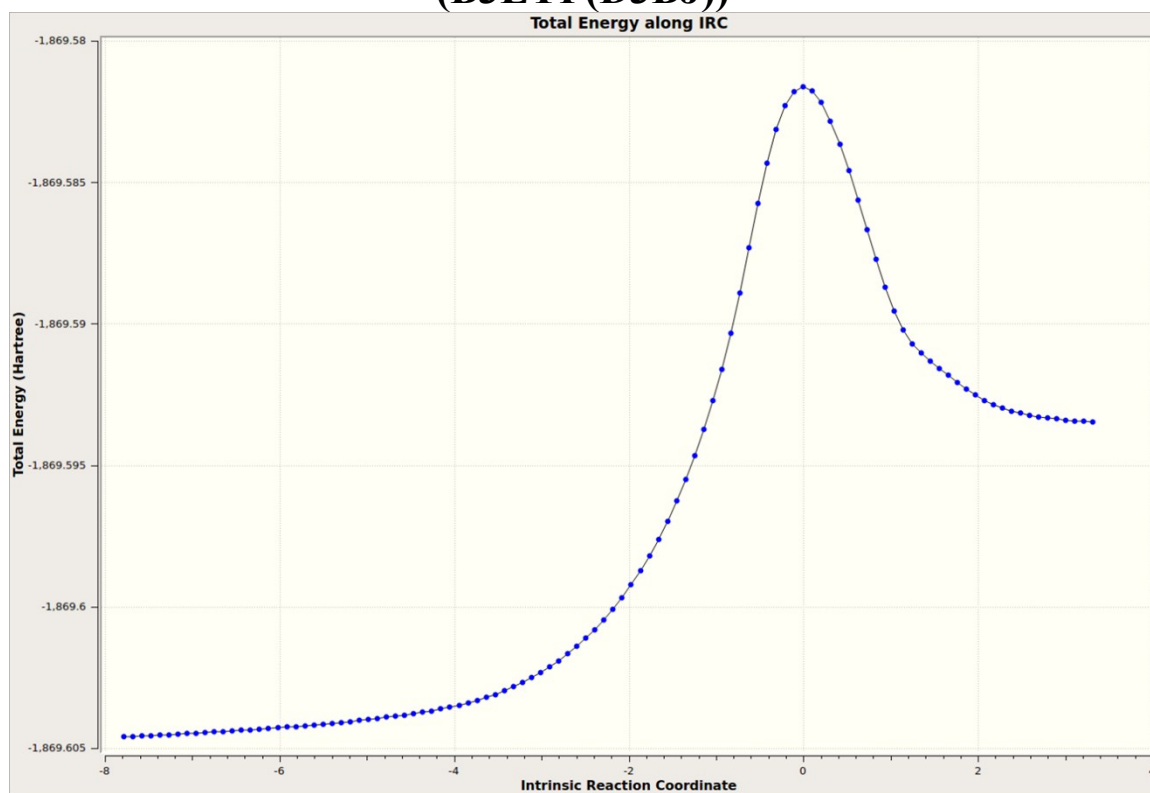

**14. Variation of Mayer Bond Order along the IRC of the Reaction Rh<sub>3</sub>V+CH<sub>4</sub>**

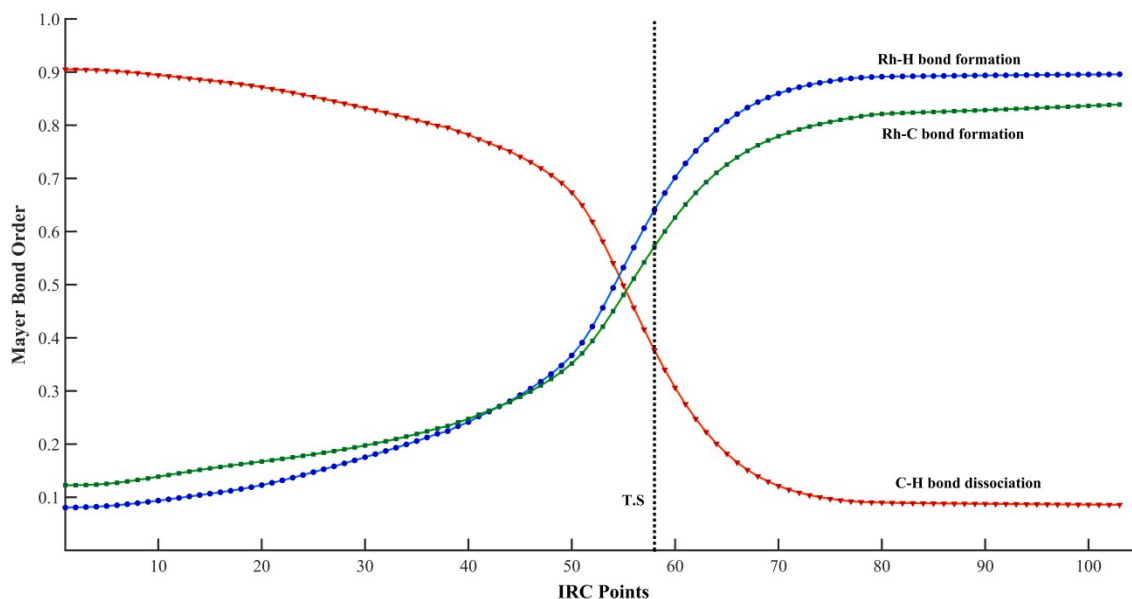

## 15. Bond Order Analysis

### a. Minimum spin $Rh_2$ and $RhV$ cluster

| Cluster | Mayer Bond Order | WBO     | WBON   |
|---------|------------------|---------|--------|
| $Rh_2$  | 2.981733         | 3.41253 | 3.0159 |
| $RhV$   | 3.53960          | 4.12256 | 3.4071 |

### b. Ground State clusters

| Cluster | Mayer Bond Order | WBO         |
|---------|------------------|-------------|
| $Rh_2$  | 1.25668          | 1.7538      |
| $Rh_5$  | 0.674-0.106      | 0.852-0.308 |
| $Rh_9$  | 0.618-0.05       | 0.73-0.104  |

| Cluster | Mayer Bond Order |           | WBO       |           |
|---------|------------------|-----------|-----------|-----------|
|         | Rh-Rh            | Rh-V      | Rh-Rh     | Rh-V      |
| $RhV$   |                  | 3.4086    |           | 3.9657    |
| $Rh_4V$ | 0.51-0.25        | 1.49-0.80 | 0.79-0.36 | 1.84-1.03 |
| $Rh_8V$ | 0.78-0.08        | 0.69-0.09 | 0.83-0.09 | 2.04-0.39 |

## 16. Energies of Selected Isomers of $Al_7V$ Cluster at Different Spin Multiplicities

## Isomer No:1

| M=2S+1 | Energy(Electronic+Thermal) |
|--------|----------------------------|
| 1      | -1718.345984               |
| 3      | -1718.355796               |
| 5      | -1718.353193               |
| 7      | -1718.365595               |
| 9      | -1718.372178               |
| 11     | -1718.357580               |
| 13     | -1718.357285               |
| 15     | -1718.337779               |
| 17     | -1718.333348               |
| 19     | -1718.287433               |

## Isomer No: 2

| M=2S+1 | Energy(Electronic+Thermal) |
|--------|----------------------------|
| 1      | -1718.333732               |
| 3      | -1718.362405               |
| 5      | -1718.363776               |
| 7      | -1718.375797 (N.D)         |
| 9      | -1718.376522 (G.M)         |
| 11     | -1718.368273               |
| 13     | -1718.370150               |
| 15     | -1718.358270               |
| 17     | Not Converged              |
| 19     | Not Converged              |

## Isomer No: 3

| M=2S+1 | Energy(Electronic+Thermal) |
|--------|----------------------------|
| 1      | -1718.340156               |
| 3      | -1718.352063               |
| 5      | -1718.355950               |
| 7      | -1718.355760               |
| 9      | -1718.350127               |
| 11     | -1718.361623               |
| 13     | -1718.330580               |
| 15     | -1718.358269               |
| 17     | -1718.326444               |
| 19     | -1718.286013               |

G.M=Global Minima

N.D= Near Degenerate structure to G.M

## 17. Energies of A, T.S., and B at Different Spin Multiplicities for Selected

# Pristine and V-Doped Rhodium Clusters [B3LYP(D3BJ)/def2-TZVP]

(Spin Multiplicities ( $M=2S+1$ ) of the clusters are included within parenthesis)

## Pristine Clusters

### **Rh<sub>4</sub> (M=7)**

| <b>Energies (E+ZPE) in a.u</b>    |                   |                    |                    |
|-----------------------------------|-------------------|--------------------|--------------------|
| <b>M=2S+1</b>                     | <b>PRC (A)</b>    | <b>TS</b>          | <b>PoRC (B)</b>    |
| 1                                 | -482.883117       | -482.863057        | -482.868662        |
| 3                                 | -482.879639       | -482.866102        | -482.882572        |
| 5                                 | -482.882132       | -482.868671        | -482.874883        |
| <b>7</b>                          | <b>-482.89351</b> | <b>-482.874617</b> | <b>-482.886817</b> |
| 9                                 | -482.870105       | -482.846787        | -482.861203        |
| 11                                | -482.827564       | -482.793927        | -482.816461        |
| <b>Relative Energy (kcal/mol)</b> |                   |                    |                    |
| 1                                 | 6.52171143        | 7.2540156          | 11.39244405        |
| 3                                 | 8.70419121        | 5.34324765         | 2.66377995         |
| 5                                 | 7.13980878        | 3.73117446         | 7.48870434         |
| <b>7</b>                          | <b>0</b>          | <b>0</b>           | <b>0</b>           |
| 9                                 | 14.68687155       | 17.4636033         | 16.07304114        |
| 11                                | 41.38177446       | 50.6337819         | 44.14909356        |

### **Rh<sub>5</sub> (M=8)**

| <b>Energies (E+ZPE) in a.u</b> |                    |                    |                    |
|--------------------------------|--------------------|--------------------|--------------------|
| <b>M=2S+1</b>                  | <b>PRC (A)</b>     | <b>TS</b>          | <b>PoRC (B)</b>    |
| 2                              | -593.50083         | -593.490222        | -593.502617        |
| 4                              | -593.50796         | -593.494807        | -593.511361        |
| 6                              | -593.513765        | -593.501848        | -593.52126         |
| <b>8</b>                       | <b>-593.525803</b> | <b>-593.511114</b> | <b>-593.524685</b> |
| 10                             | -593.512507        | -593.485302        | -593.511938        |
| 12                             | -593.485903        | -593.444327        | -593.484677        |

|                                   |             |             |             |
|-----------------------------------|-------------|-------------|-------------|
| 14                                | -593.442804 | -593.38355  | -593.411394 |
| <b>Relative Energy (kcal/mol)</b> |             |             |             |
| 2                                 | 15.67080723 | 13.10993892 | 13.84789068 |
| 4                                 | 11.19666093 | 10.23280557 | 8.36094324  |
| 6                                 | 7.55396538  | 5.81450766  | 2.14922175  |
| <b>8</b>                          | <b>0</b>    | <b>0</b>    | <b>0</b>    |
| 10                                | 8.34337296  | 16.19728812 | 7.99886997  |
| 12                                | 25.037649   | 41.90951037 | 25.10542008 |
| 14                                | 52.08270249 | 80.04768564 | 71.09123541 |

## V-Doped Clusters

### **Rh<sub>3</sub>V (M=1)**

|                                   | <b>Energies (E+ZPE) in a.u</b> |                     |                     |
|-----------------------------------|--------------------------------|---------------------|---------------------|
| <b>M=2S+1</b>                     | <b>PRC (A)</b>                 | <b>TS</b>           | <b>PoRC (B)</b>     |
| <b>1</b>                          | <b>-1316.323959</b>            | <b>-1316.308998</b> | <b>-1316.325234</b> |
| 3                                 | -1316.313883                   | -1316.299693        | -1316.312164        |
| 5                                 | -1316.302224                   | -1316.287796        | -1316.294017        |
| 7                                 | -1316.294254                   | -1316.282827        | -1316.295411        |
| 9                                 | -1316.268407                   | -1316.254517        | -1316.288966        |
| <b>Relative Energy (kcal/mol)</b> |                                |                     |                     |
| <b>1</b>                          | <b>0</b>                       | <b>0</b>            | <b>0</b>            |
| 3                                 | 6.32279076                     | 5.83898055          | 8.2015557           |
| 5                                 | 13.63892985                    | 13.30446702         | 19.58897967         |
| 7                                 | 18.64018455                    | 16.42256421         | 18.71423073         |
| 9                                 | 34.85943552                    | 34.18737231         | 22.75853268         |

### **Rh<sub>4</sub>V (M=2)**



|               | <b>Energies (E+ZPE) in a.u</b>    |                     |                     |
|---------------|-----------------------------------|---------------------|---------------------|
| <b>M=2S+1</b> | <b>PRC (A)</b>                    | <b>TS</b>           | <b>PoRC (B)</b>     |
| <b>2</b>      | <b>-1426.950054</b>               | <b>-1426.939354</b> | <b>-1426.958034</b> |
| 4             | -1426.936728                      | -1426.936399        | -1426.952155        |
| 6             | -1426.93853                       | -1426.924659        | -1426.945822        |
| 8             | -1426.923831                      | -1426.917786        | -1426.93622         |
| 10            | -1426.912912                      | -1426.894425        | -1426.931592        |
|               | <b>Relative Energy (kcal/mol)</b> |                     |                     |
| <b>2</b>      | <b>0</b>                          | <b>0</b>            | <b>0</b>            |
| 4             | 8.36219826                        | 1.85429205          | 3.68913129          |
| 6             | 7.23142524                        | 9.22125945          | 7.66315212          |
| 8             | 16.45519473                       | 13.53413568         | 13.68850314         |
| 10            | 23.30697642                       | 28.19339679         | 16.59261942         |

### **Rh<sub>6</sub>V (M=8)**

|               | <b>Energies (E+ZPE) in a.u</b>    |                     |                     |
|---------------|-----------------------------------|---------------------|---------------------|
| <b>M=2S+1</b> | <b>PRC (A)</b>                    | <b>TS</b>           | <b>PoRC (B)</b>     |
| 2             | -1648.232437                      | -1648.216209        | -1648.226538        |
| 4             | -1648.234095                      | -1648.208335        | -1648.230198        |
| 6             | -1648.241961                      | -1648.226553        | -1648.239531        |
| <b>8</b>      | <b>-1648.249083</b>               | <b>-1648.232214</b> | <b>-1648.241542</b> |
| 10            | -1648.237173                      | -1648.219892        | -1648.2359          |
| 12            | -1648.221572                      | -1648.202381        | -1648.223282        |
|               | <b>Relative Energy (kcal/mol)</b> |                     |                     |
| 2             | 10.44553146                       | 10.04329755         | 9.41516004          |
| 4             | 9.40511988                        | 14.98431129         | 7.11847344          |
| 6             | 4.46912622                        | 3.55233411          | 1.26192261          |
| <b>8</b>      | <b>0</b>                          | <b>0</b>            | <b>0</b>            |
| 10            | 7.4736441                         | 7.73217822          | 3.54041142          |
| 12            | 17.26342761                       | 18.72050583         | 11.4583326          |

## 18. Table of the Spin Contamination Values for Selected Complexes

| Cluster           | Spin Multiplicity | Number of unpaired electrons | $s(s+1)^\dagger$ | Reported Values of $\langle S^2 \rangle$ from Gaussian16 Output (B3LYP-D3(BJ)/def2-TZVP) |         |         |
|-------------------|-------------------|------------------------------|------------------|------------------------------------------------------------------------------------------|---------|---------|
|                   |                   |                              |                  | A                                                                                        | T.S     | B       |
| Rh <sub>2</sub> V | 4                 | 3                            | 3.75             | 3.7554                                                                                   | 3.7559  | 3.7620  |
| Rh <sub>6</sub> V | 8                 | 7                            | 15.75            | 15.7551                                                                                  | 15.7534 | 15.7533 |
| Rh <sub>7</sub> V | 9                 | 8                            | 20               | 20.0266                                                                                  | 20.0283 | 20.0093 |
| Rh <sub>8</sub> V | 12                | 11                           | 35.75            | 35.7598                                                                                  | 35.7558 | 35.7570 |
| Rh <sub>7</sub>   | 14                | 13                           | 48.75            | 48.7526                                                                                  | 48.7520 | 48.7515 |
| Rh <sub>8</sub>   | 13                | 12                           | 42               | 42.0071                                                                                  | 42.0047 | 42.0048 |
| Rh <sub>9</sub>   | 18                | 17                           | 80.75            | 80.7521                                                                                  | 80.7520 | 80.7521 |

<sup>†</sup>s equals 1/2 times the number of unpaired electrons.
